# Supplementary material
Source: PubMed Central journal article supplement (PMC3556999)
Supplement: NIHMS428944-supplement-1.pdf [file NIHMS428944-supplement-1.pdf]

**Analysis of  $^{15}\text{N}$ - $^1\text{H}$  NMR relaxation in proteins by a combined experimental and molecular dynamics simulation approach: Picosecond-nanosecond dynamics of the Rho GTPase binding domain of plexin-B1 in the dimeric state indicate allosteric pathways.**

*Mirco Zerbetto, Ross Anderson, Sabine Bouguet-Bonnet, Mariano Rech, Liqun Zhang, Eva Meirovitch, Antonino Polimeno and Matthias Buck*

*Mirco Zerbetto et al.*

**Supporting Information elementary materials:**

**Supplementary Text:**

**The SRLS generalized order parameter.**

An order parameter  $S^2$  can be defined from SRLS as follows:

In the Principal Axes System of the local ordering tensor, where only  $\langle D_{0,0}^2 \rangle$  and  $\langle D_{0,2}^2 + D_{0,-2}^2 \rangle$  survive, one has:

$$S^2 = \langle D_{0,0}^2 \rangle^2 + 2\{\text{Re}\langle D_{0,2}^2 \rangle\}^2 \quad (16)$$

Given that  $S_0^2 = \langle D_{0,0}^2 \rangle$  and  $S_2^2 = \langle D_{0,2}^2 + D_{0,-2}^2 \rangle = 2\{\text{Re}\langle D_{0,2}^2 \rangle\}$ , one obtains:

$$S^2 = (S_0^2)^2 + \frac{1}{2}(S_2^2)^2 \quad (27)$$

Formatted: Font: 14 pt, Bold

Formatted

Formatted: Font: 14 pt, Bold

Formatted: Font: Italic

Formatted: Font: Italic

Formatted: Font: 12 pt

Formatted: Font: 12 pt

Formatted: Indent: First line: 0"

Formatted: Font: Bold

Field Code Changed

Field Code Changed

Field Code Changed

Field Code Changed

Formatted

Field Code Changed

Field Code Changed

Formatted: Indent: First line: 0"

Field Code Changed

Thus,  $S^2$  is a composite including inseparably the physical order parameters  $S_0^2$  and  $S_2^2$ .

- Formatted
- Field Code Changed
- Field Code Changed
- Field Code Changed

-Models used in the MF-based computer programs Dynamics (see also **Table**

**S2**)

$S^2$  is allowed to vary in model 1 ( $S^2 = 0$  represents complete motional freedom whereas  $S^2 = 1$  represents complete rigidity).  $S^2$  and  $\tau_e$  are allowed to vary in model 2 (larger values of  $\tau_e$  signify enhanced mobility).  $S^2$  and the conformational exchange term,  $R_{ex}$  (added phenomenologically to  $R_2$ ) are allowed to vary in model 3.  $S^2$ ,  $\tau_e$  and  $R_{ex}$  are allowed to vary in model 4.  $S_s^2$ ,  $S_f^2$ ,  $S_s^2 - S_f^2$  and  $\tau_s$  with  $\tau_f = 0$  ( $S_s^2$ ,  $S_f^2$ ,  $S_s^2 - S_f^2$ ,  $\tau_s$  and  $\tau_f$ ) are allowed to vary in model 5 (6). Model 5 represents the reduced EMF formula. Models 7 and 8 are not used herein. The data-fitting scheme considers first model 1. If the statistical requirements are fulfilled, this model will be accepted. Otherwise, the program proceeds systematically to the higher models according to statistical criteria.-

Formatted: Normal

Mirco – we need to make a table for the MF S2 analysis table – I thought You/Eva had made this, maybe it is in the zipped file or it got lost???

Formatted: Font: Times New Roman

Field Code Changed

Formatted: Font: Not Italic

Field Code Changed

Formatted: Font: Times New Roman

Formatted: Font: Times New Roman

Field Code Changed

Field Code Changed

Formatted: Font: Times New Roman

Field Code Changed

Field Code Changed

Field Code Changed

Formatted: Font: Times New Roman

Field Code Changed

Field Code Changed

Formatted: Font: Times New Roman

Field Code Changed

Field Code Changed

Formatted: Font: Times New Roman

Field Code Changed

Formatted: Font: Times New Roman

Field Code Changed

Formatted: Font: Times New Roman

Formatted



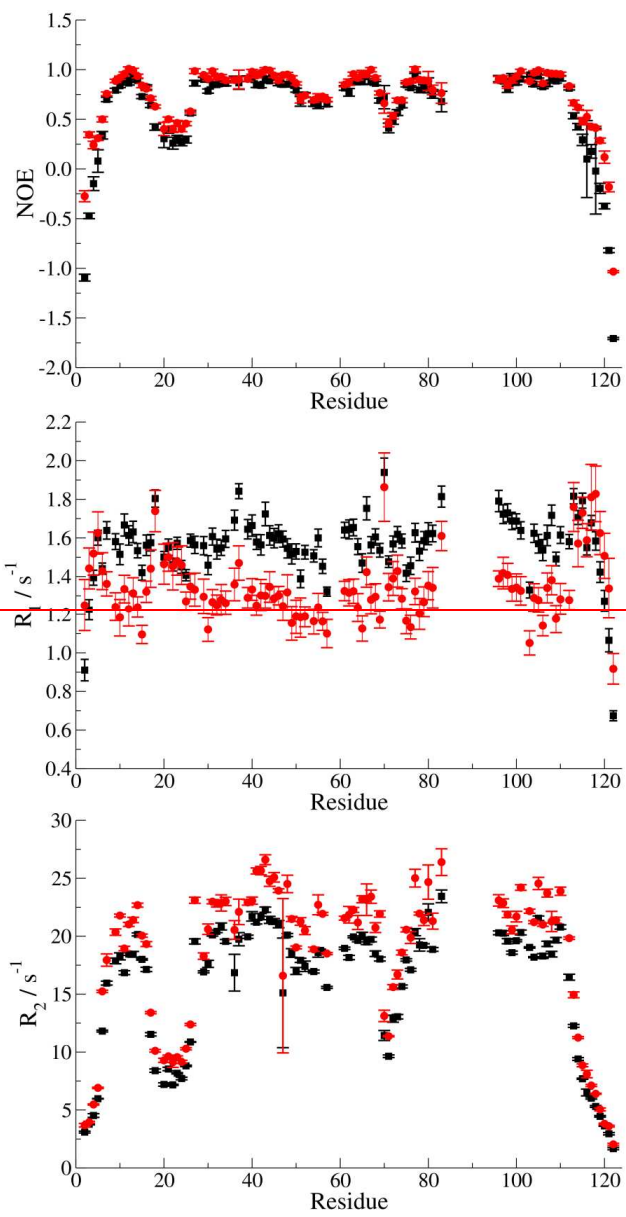

Formatted: Centered

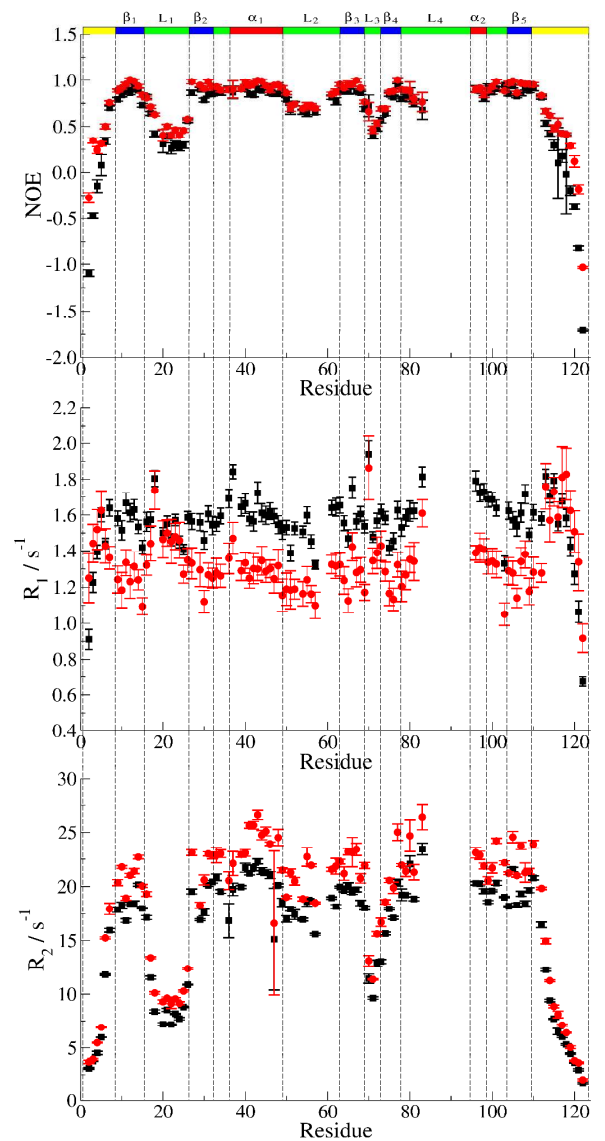

**Figure S1.** Experimental  $^{15}\text{N}$   $R_1$ ,  $R_2$  and  $^{15}\text{N}$ - $\{^1\text{H}\}$  NOE for the RBD dimer acquired at magnetic fields of 14.1 T (black squares) and 18.8 T (red circles).

Formatted

Formatted: No underline

Formatted: Font: Bold

Formatted: Centered

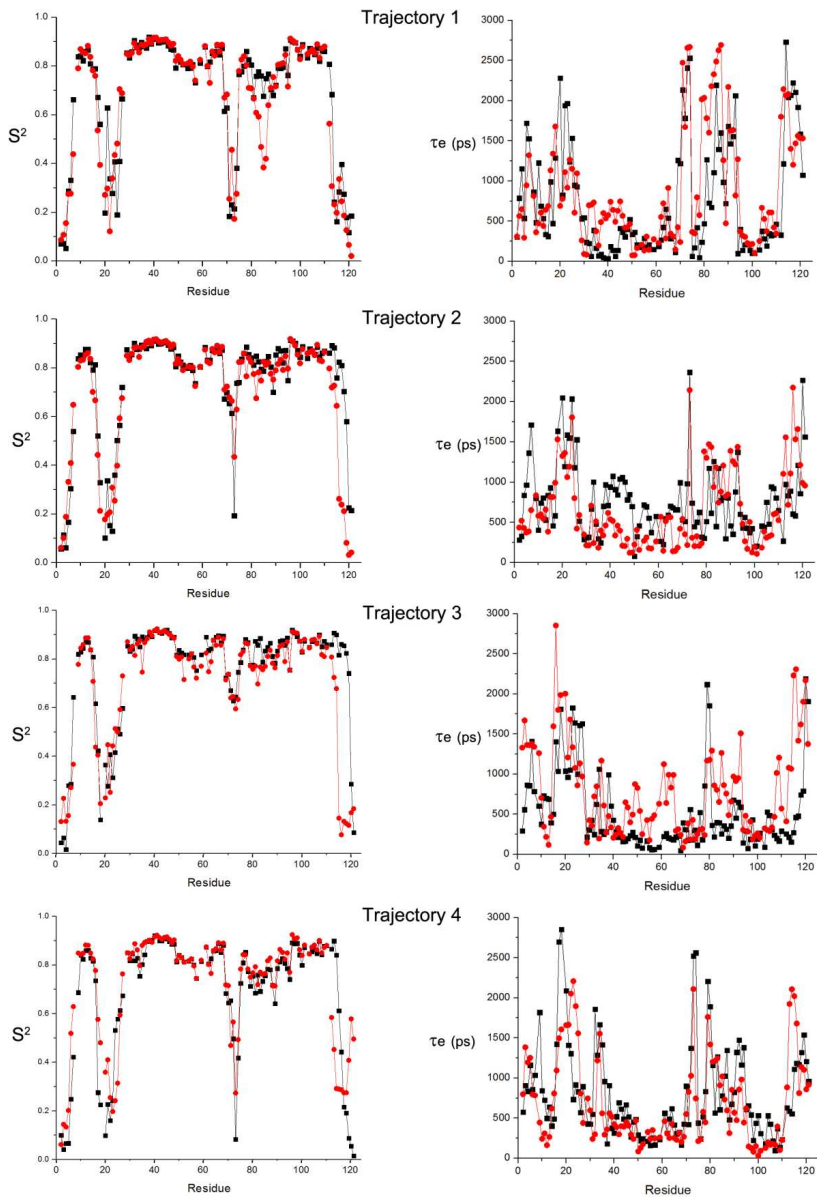

-

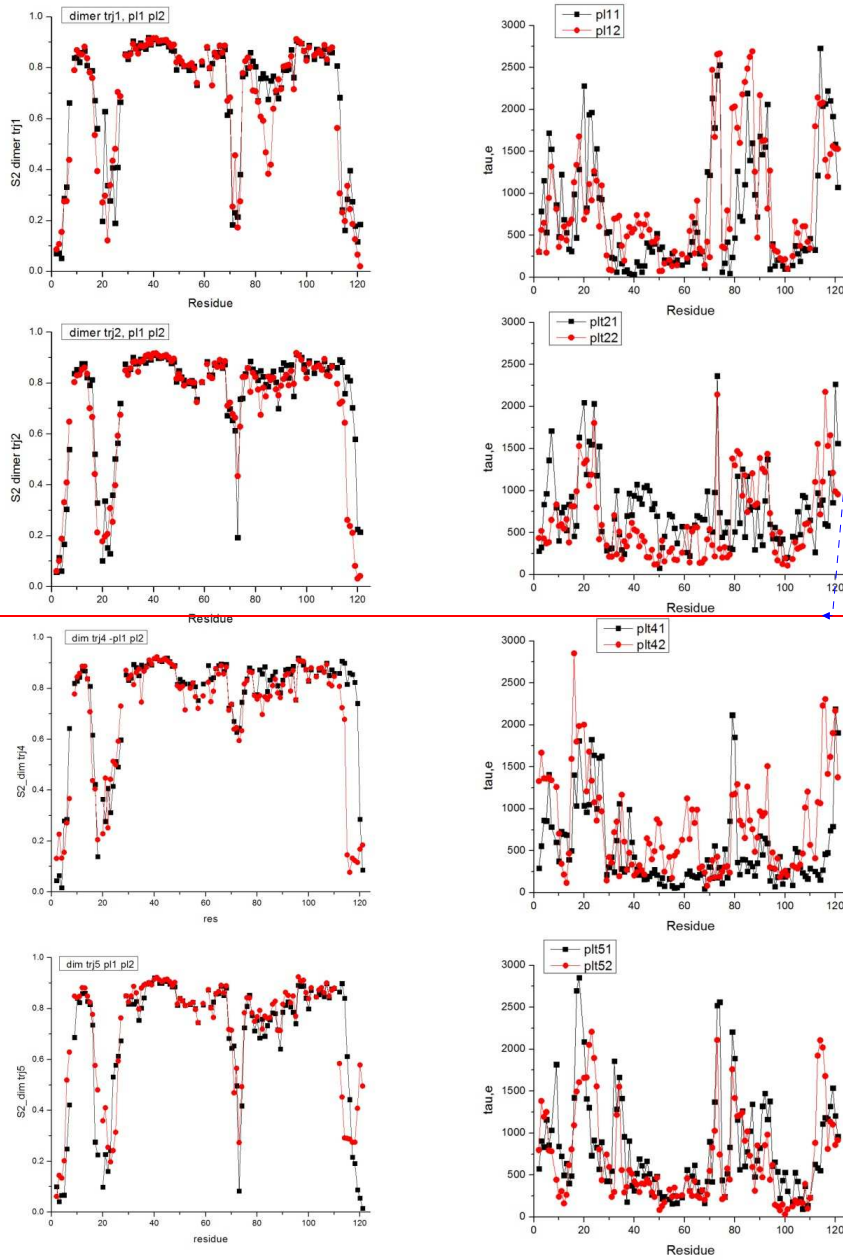

Formatted: Centered, Right: 0"

**Figure S2.** Squared generalized order parameters,  $S^2$ , and effective correlation times for local motion,  $\tau_e$ , obtained for the plexin-B1 RBD dimer from the

I will replot this figure :[Comment [MB2  
 Formatted: Font: Times New Roman, 12 pt  
 Formatted: Right: 0"  
 Field Code Changed  
 Field Code Changed  
 Formatted: Font: Times New Roman



individual MD trajectories, as described in the text. Black squares and red circles distinguish between data calculated respectively for the first monomer (residues 1 to 124) and the second one (residues 125 to 248).————

Formatted

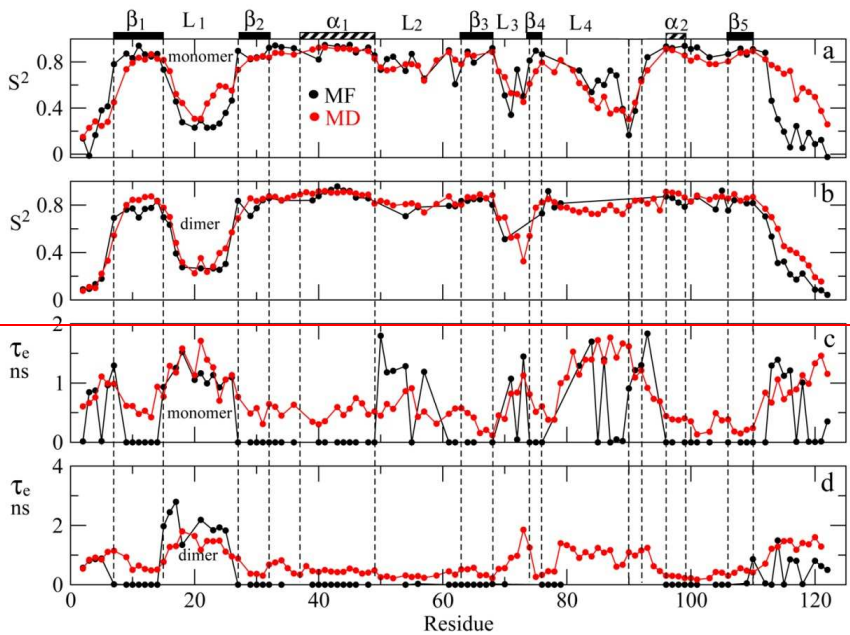

Formatted: Right: -0.81"

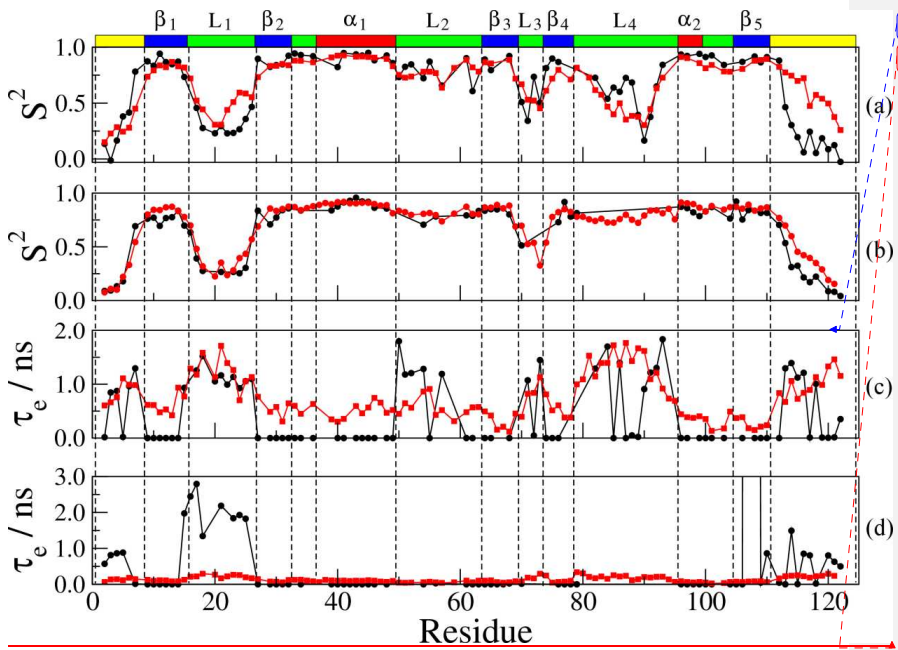

Formatted: Centered, Right: -0.81"

Formatted: Font: Not Bold, No underline

**Figure S3.** Best-fit  $S^2$  (a) and  $\tau_e$  (c) values obtained for the monomer mutant of the RBD with MF (black circles) and MD (red squares) analyses. Best-fit  $S^2$  (b) and  $\tau_e$  (d) values obtained for the RBD dimer with MF (black circles) and MD (red squares) analyses.-

Formatted: No underline

Formatted: Font: Bold

Formatted

Field Code Changed

Field Code Changed

Formatted: Font: Times New Roman

Field Code Changed

Field Code Changed

Formatted: Font: Times New Roman

**Table S1.** Parameters associated with the generation of the four MD trajectories for the plexin-B1 RBD dimer. Additional details, and pertinent references, are given in the text.-

|                                             |                                                                                                     |
|---------------------------------------------|-----------------------------------------------------------------------------------------------------|
| Protein Data Bank file                      | 2JPH                                                                                                |
| Protein charge                              | +2, neutralized by counterions                                                                      |
| Number of water molecules                   | 14605                                                                                               |
| Water molecule model                        | TIP3P                                                                                               |
| Cubic periodic box dimension                | 80 Å                                                                                                |
| Ensemble                                    | N (47661 atoms), P (1 atm), T (300 K)                                                               |
| Thermostat                                  | Temperature coupling                                                                                |
| Barostat                                    | Nosé – Hoover Langevin piston (piston period 200 fs, piston decay 100 fs, piston temperature 300 K) |
| Non-bonded interactions cutoff              | 12 Å, smoothing switch at 10 Å                                                                      |
| Pair list distance                          | 13.5 Å                                                                                              |
| Electrostatics                              | PME                                                                                                 |
| Time step of integration                    | 2 fs                                                                                                |
| Coordinates and velocities saving frequency | 2500 MD steps                                                                                       |
| Equilibration period                        | 5 ns                                                                                                |
| Production period                           | 50 ns                                                                                               |

Formatted: Normal, Indent: Left: 0", Right: 0", Line spacing: Double

Formatted: Font: 12 pt

Formatted

**Table S2.** Experimental  $^{15}\text{N}$   $R_1$ ,  $^{15}\text{N}$   $R_2$  data and their uncertainties in  $\text{s}^{-1}$ , and experimental  $^{15}\text{N}\{-^1\text{H}\}$  NOEs and their uncertainties.

| Res | 14.1 T |                      |       |               |        |               | 18.8 T |                      |       |               |        |               |
|-----|--------|----------------------|-------|---------------|--------|---------------|--------|----------------------|-------|---------------|--------|---------------|
|     | NOE    | $\sigma(\text{NOE})$ | $R_1$ | $\sigma(R_1)$ | $R_2$  | $\sigma(R_2)$ | NOE    | $\sigma(\text{NOE})$ | $R_1$ | $\sigma(R_1)$ | $R_2$  | $\sigma(R_2)$ |
| 2   | -1.094 | 0.034                | 0.911 | 0.056         | 3.095  | 0.079         | -0.275 | 0.056                | 1.250 | 0.135         | 3.686  | 0.155         |
| 3   | -0.472 | 0.028                | 1.226 | 0.054         | 3.772  | 0.051         | 0.345  | 0.028                | 1.442 | 0.106         | 3.946  | 0.081         |
| 4   | -0.148 | 0.069                | 1.394 | 0.039         | 4.525  | 0.159         | 0.242  | 0.037                | 1.519 | 0.112         | 5.477  | 0.050         |
| 5   | 0.080  | 0.113                | 1.601 | 0.039         | 5.976  | 0.023         | 0.310  | 0.023                | 1.626 | 0.109         | 6.912  | 0.058         |
| 6   | 0.339  | 0.038                | 1.441 | 0.029         | 11.810 | 0.077         | 0.500  | 0.026                | 1.428 | 0.096         | 15.240 | 0.091         |
| 7   | 0.700  | 0.022                | 1.639 | 0.045         | 15.950 | 0.171         | 0.757  | 0.019                | 1.362 | 0.063         | 17.940 | 0.531         |
| 9   | 0.793  | 0.020                | 1.581 | 0.041         | 17.870 | 0.252         | 0.887  | 0.017                | 1.242 | 0.074         | 20.350 | 0.271         |
| 10  | 0.838  | 0.019                | 1.515 | 0.053         | 18.260 | 0.302         | 0.918  | 0.017                | 1.184 | 0.097         | 21.780 | 0.121         |
| 11  | 0.899  | 0.021                | 1.667 | 0.057         | 16.850 | 0.167         | 0.956  | 0.020                | 1.335 | 0.072         | 18.940 | 0.181         |
| 12  | 0.865  | 0.020                | 1.613 | 0.050         | 18.460 | 0.117         | 1.008  | 0.020                | 1.230 | 0.091         | 21.020 | 0.171         |
| 13  | 0.930  | 0.025                | 1.631 | 0.055         | 18.440 | 0.246         | 0.992  | 0.022                | 1.313 | 0.081         | 21.400 | 0.231         |
| 14  | 0.891  | 0.020                | 1.534 | 0.037         | 20.150 | 0.130         | 0.935  | 0.020                | 1.240 | 0.055         | 22.680 | 0.171         |
| 15  | 0.729  | 0.021                | 1.420 | 0.039         | 18.000 | 0.067         | 0.840  | 0.021                | 1.095 | 0.047         | 20.050 | 0.131         |
| 16  | 0.824  | 0.023                | 1.562 | 0.053         | 17.130 | 0.186         | 0.809  | 0.020                | 1.321 | 0.055         | 19.320 | 0.211         |
| 17  | 0.640  | 0.022                | 1.575 | 0.043         | 11.530 | 0.144         | 0.712  | 0.018                | 1.441 | 0.097         | 13.400 | 0.091         |
| 18  | 0.421  | 0.032                | 1.804 | 0.045         | 8.399  | 0.142         | 0.629  | 0.017                | 1.739 | 0.107         | 10.110 | 0.111         |
| 20  | 0.306  | 0.091                | 1.501 | 0.029         | 7.205  | 0.147         | 0.403  | 0.066                | 1.464 | 0.104         | 9.288  | 0.171         |

|                    |          |
|--------------------|----------|
| Formatted          | ... [1]  |
| Formatted          | ... [2]  |
| Formatted          | ... [3]  |
| Formatted          | ... [4]  |
| Formatted Table    | ... [5]  |
| Formatted          | ... [6]  |
| Formatted          | ... [7]  |
| Formatted          | ... [17] |
| Field Code Changed | ... [9]  |
| Formatted          | ... [10] |
| Formatted          | ... [16] |
| Field Code Changed | ... [8]  |
| Field Code Changed | ... [11] |
| Formatted          | ... [12] |
| Field Code Changed | ... [13] |
| Formatted          | ... [14] |
| Field Code Changed | ... [15] |
| Field Code Changed | ... [18] |
| Field Code Changed | ... [19] |
| Field Code Changed | ... [20] |
| Field Code Changed | ... [21] |
| Field Code Changed | ... [22] |
| Formatted          | ... [23] |
| Formatted          | ... [24] |
| Formatted          | ... [25] |
| Formatted          | ... [26] |
| Formatted          | ... [27] |
| Formatted          | ... [28] |
| Formatted          | ... [29] |
| Formatted          | ... [30] |
| Formatted          | ... [31] |
| Formatted          | ... [32] |
| Formatted          | ... [33] |
| Formatted          | ... [34] |
| Formatted          | ... [35] |
| Formatted          | ... [36] |
| Formatted          | ... [37] |
| Formatted          | ... [38] |
| Formatted          | ... [39] |
| Formatted          | ... [40] |
| Formatted          | ... [41] |
| Formatted          | ... [42] |
| Formatted          | ... [43] |
| Formatted          | ... [44] |
| Formatted          | ... [45] |
| Formatted          | ... [46] |
| Formatted          | ... [47] |
| Formatted          | ... [48] |
| Formatted          | ... [49] |
| Formatted          | ... [50] |
| Formatted          | ... [51] |
| Formatted          | ... [52] |
| Formatted          | ... [53] |
| Formatted          | ... [54] |
| Formatted          | ... [55] |
| Formatted          | ... [56] |
| Formatted          | ... [57] |
| Formatted          | ... [58] |

|    |       |       |       |       |        |       |       |       |       |       |        |       |
|----|-------|-------|-------|-------|--------|-------|-------|-------|-------|-------|--------|-------|
| 21 | 0.394 | 0.033 | 1.552 | 0.042 | 8.540  | 0.145 | 0.500 | 0.023 | 1.500 | 0.072 | 9.631  | 0.108 |
| 22 | 0.259 | 0.060 | 1.462 | 0.033 | 7.170  | 0.054 | 0.401 | 0.033 | 1.453 | 0.122 | 9.127  | 0.444 |
| 23 | 0.298 | 0.041 | 1.572 | 0.031 | 8.170  | 0.058 | 0.463 | 0.025 | 1.480 | 0.073 | 9.561  | 0.111 |
| 24 | 0.273 | 0.039 | 1.450 | 0.033 | 7.718  | 0.110 | 0.401 | 0.026 | 1.459 | 0.100 | 9.151  | 0.134 |
| 25 | 0.295 | 0.034 | 1.407 | 0.029 | 8.809  | 0.065 | 0.457 | 0.021 | 1.271 | 0.049 | 10.290 | 0.091 |
| 26 | 0.562 | 0.020 | 1.586 | 0.034 | 10.870 | 0.027 | 0.578 | 0.016 | 1.348 | 0.065 | 12.380 | 0.090 |
| 27 | 0.864 | 0.028 | 1.564 | 0.045 | 19.550 | 0.224 | 0.985 | 0.024 | 1.332 | 0.085 | 23.100 | 0.267 |
| 29 | 0.902 | 0.019 | 1.560 | 0.047 | 16.920 | 0.088 | 0.946 | 0.016 | 1.295 | 0.092 | 18.280 | 0.271 |
| 30 | 0.785 | 0.021 | 1.459 | 0.049 | 17.610 | 0.304 | 0.910 | 0.019 | 1.121 | 0.061 | 20.600 | 0.451 |
| 31 | 0.849 | 0.023 | 1.607 | 0.044 | 20.110 | 0.100 | 0.985 | 0.020 | 1.267 | 0.065 | 22.980 | 0.181 |
| 32 | 0.849 | 0.020 | 1.542 | 0.051 | 20.420 | 0.111 | 0.924 | 0.019 | 1.250 | 0.054 | 22.830 | 0.311 |
| 33 | 0.864 | 0.023 | 1.549 | 0.040 | 20.840 | 0.303 | 0.929 | 0.022 | 1.279 | 0.079 | 22.870 | 0.691 |
| 34 | 0.862 | 0.025 | 1.595 | 0.044 | 19.550 | 0.167 | 0.893 | 0.020 | 1.262 | 0.063 | 23.000 | 0.351 |
| 36 | 0.904 | 0.030 | 1.692 | 0.052 | 16.850 | 1.586 | 0.896 | 0.029 | 1.359 | 0.084 | 20.540 | 0.801 |
| 37 | 0.868 | 0.066 | 1.842 | 0.039 | 19.740 | 0.567 | 0.901 | 0.094 | 1.470 | 0.089 | 22.100 | 1.101 |
| 39 | 0.908 | 0.029 | 1.645 | 0.050 | 19.950 | 0.136 | 0.906 | 0.022 | 1.290 | 0.053 | 22.920 | 0.231 |
| 40 | 0.910 | 0.025 | 1.664 | 0.055 | 21.710 | 0.408 | 0.978 | 0.024 | 1.333 | 0.056 | 23.070 | 0.301 |
| 41 | 0.845 | 0.026 | 1.579 | 0.039 | 21.210 | 0.161 | 0.941 | 0.024 | 1.249 | 0.054 | 25.630 | 0.261 |
| 42 | 0.842 | 0.023 | 1.564 | 0.053 | 21.690 | 0.264 | 0.967 | 0.019 | 1.302 | 0.083 | 25.660 | 0.351 |
| 43 | 0.907 | 0.026 | 1.724 | 0.061 | 22.290 | 0.226 | 0.998 | 0.022 | 1.300 | 0.064 | 26.600 | 0.421 |
| 44 | 0.887 | 0.023 | 1.613 | 0.050 | 21.410 | 0.307 | 0.991 | 0.020 | 1.346 | 0.079 | 24.740 | 0.431 |
| 45 | 0.923 | 0.024 | 1.599 | 0.050 | 21.270 | 0.248 | 0.941 | 0.021 | 1.287 | 0.061 | 25.080 | 0.411 |
| 46 | 0.866 | 0.027 | 1.622 | 0.046 | 21.040 | 0.315 | 0.894 | 0.026 | 1.301 | 0.048 | 23.930 | 0.161 |
| 47 | 0.851 | 0.025 | 1.594 | 0.041 | 15.110 | 4.729 | 0.945 | 0.018 | 1.246 | 0.078 | 16.590 | 6.661 |

- Formatted ... [59]
- Formatted ... [60]
- Formatted ... [61]
- Formatted ... [62]
- Formatted ... [63]
- Formatted ... [64]
- Formatted ... [65]
- Formatted ... [66]
- Formatted ... [67]
- Formatted ... [68]
- Formatted ... [69]
- Formatted ... [70]
- Formatted ... [71]
- Formatted ... [74]
- Formatted ... [75]
- Formatted ... [76]
- Formatted ... [77]
- Formatted ... [78]
- Formatted ... [79]
- Formatted ... [80]
- Formatted ... [72]
- Formatted ... [73]
- Formatted ... [81]
- Formatted ... [82]
- Formatted ... [83]
- Formatted ... [84]
- Formatted ... [85]
- Formatted ... [86]
- Formatted ... [87]
- Formatted ... [88]
- Formatted ... [89]
- Formatted ... [90]
- Formatted ... [91]
- Formatted ... [92]
- Formatted ... [93]
- Formatted ... [94]
- Formatted ... [95]
- Formatted ... [96]
- Formatted ... [97]
- Formatted ... [98]
- Formatted ... [99]
- Formatted ... [100]
- Formatted ... [101]
- Formatted ... [102]
- Formatted ... [103]
- Formatted ... [104]
- Formatted ... [105]
- Formatted ... [106]
- Formatted ... [107]

|    |       |       |       |       |        |       |       |       |       |       |        |        |                     |
|----|-------|-------|-------|-------|--------|-------|-------|-------|-------|-------|--------|--------|---------------------|
| 48 | 0.853 | 0.027 | 1.546 | 0.050 | 20.100 | 0.133 | 0.950 | 0.023 | 1.318 | 0.091 | 24.510 | +0.754 | Formatted: Centered |
| 49 | 0.857 | 0.023 | 1.517 | 0.052 | 18.550 | 0.372 | 0.919 | 0.020 | 1.155 | 0.089 | 21.490 | +0.214 | Formatted: Centered |
| 50 | 0.793 | 0.020 | 1.530 | 0.039 | 17.000 | 0.302 | 0.861 | 0.017 | 1.189 | 0.088 | 19.030 | +0.127 | Formatted: Centered |
| 51 | 0.681 | 0.049 | 1.388 | 0.046 | 17.920 | 0.184 | 0.706 | 0.042 | 1.185 | 0.104 | 21.270 | +0.324 | Formatted: Centered |
| 52 | 0.746 | 0.023 | 1.526 | 0.035 | 17.400 | 0.448 | 0.740 | 0.021 | 1.189 | 0.054 | 20.480 | +0.344 | Formatted: Centered |
| 54 | 0.658 | 0.027 | 1.507 | 0.032 | 16.950 | 0.134 | 0.695 | 0.024 | 1.164 | 0.067 | 18.870 | +0.184 | Formatted: Centered |
| 55 | 0.650 | 0.042 | 1.600 | 0.046 | 18.600 | 0.412 | 0.722 | 0.035 | 1.240 | 0.073 | 22.710 | +0.854 | Formatted: Centered |
| 56 | 0.710 | 0.022 | 1.453 | 0.037 | 18.650 | 0.128 | 0.729 | 0.019 | 1.163 | 0.047 | 21.930 | +0.114 | Formatted: Centered |
| 57 | 0.654 | 0.025 | 1.322 | 0.024 | 15.580 | 0.090 | 0.697 | 0.022 | 1.100 | 0.073 | 18.500 | +0.084 | Formatted: Centered |
| 61 | 0.815 | 0.023 | 1.641 | 0.040 | 18.950 | 0.099 | 0.849 | 0.022 | 1.325 | 0.050 | 21.560 | +0.164 | Formatted: Centered |
| 62 | 0.772 | 0.038 | 1.644 | 0.049 | 18.160 | 0.185 | 0.874 | 0.031 | 1.316 | 0.068 | 21.850 | +0.714 | Formatted: Centered |
| 63 | 0.881 | 0.024 | 1.654 | 0.043 | 19.940 | 0.084 | 0.955 | 0.020 | 1.324 | 0.063 | 22.270 | +0.214 | Formatted: Centered |
| 64 | 0.876 | 0.021 | 1.555 | 0.041 | 19.640 | 0.130 | 0.916 | 0.021 | 1.237 | 0.075 | 21.180 | +0.604 | Formatted: Centered |
| 65 | 0.882 | 0.032 | 1.470 | 0.048 | 20.100 | 0.235 | 0.956 | 0.036 | 1.126 | 0.065 | 23.190 | +0.294 | Formatted: Centered |
| 66 | 0.953 | 0.024 | 1.753 | 0.060 | 19.500 | 0.220 | 0.955 | 0.023 | 1.423 | 0.078 | 23.150 | +1.364 | Formatted: Centered |
| 67 | 0.879 | 0.023 | 1.564 | 0.043 | 19.720 | 0.205 | 0.999 | 0.022 | 1.280 | 0.078 | 23.410 | +0.574 | Formatted: Centered |
| 68 | 0.862 | 0.019 | 1.605 | 0.042 | 18.490 | 0.243 | 0.918 | 0.018 | 1.295 | 0.068 | 20.740 | +0.424 | Formatted: Centered |
| 69 | 0.689 | 0.024 | 1.536 | 0.035 | 18.030 | 0.171 | 0.765 | 0.020 | 1.172 | 0.043 | 21.920 | +0.274 | Formatted: Centered |
| 70 | 0.723 | 0.117 | 1.939 | 0.075 | 11.430 | 0.430 | 0.661 | 0.099 | 1.863 | 0.177 | 13.120 | +0.494 | Formatted: Centered |
| 71 | 0.412 | 0.049 | 1.477 | 0.030 | 9.639  | 0.110 | 0.463 | 0.039 | 1.345 | 0.071 | 11.370 | +0.054 | Formatted: Centered |
| 72 | 0.491 | 0.041 | 1.569 | 0.041 | 12.880 | 0.303 | 0.536 | 0.033 | 1.390 | 0.088 | 15.610 | +0.204 | Formatted: Centered |
| 73 | 0.568 | 0.030 | 1.619 | 0.040 | 13.050 | 0.193 | 0.691 | 0.022 | 1.428 | 0.083 | 16.690 | +0.384 | Formatted: Centered |
| 74 | 0.642 | 0.026 | 1.584 | 0.036 | 15.660 | 0.130 | 0.693 | 0.023 | 1.285 | 0.052 | 18.590 | +0.204 | Formatted: Centered |
| 75 | 0.847 | 0.020 | 1.417 | 0.043 | 17.950 | 0.103 | 0.873 | 0.016 | 1.166 | 0.067 | 20.560 | +0.184 | Formatted: Centered |

|     |       |       |       |       |        |       |       |       |       |       |        |        |                                                                            |
|-----|-------|-------|-------|-------|--------|-------|-------|-------|-------|-------|--------|--------|----------------------------------------------------------------------------|
| 76  | 0.818 | 0.019 | 1.456 | 0.045 | 17.100 | 0.123 | 0.882 | 0.018 | 1.133 | 0.061 | 19.880 | +0.501 | Formatted: Centered                                                        |
| 77  | 0.936 | 0.027 | 1.627 | 0.048 | 20.350 | 0.308 | 1.004 | 0.025 | 1.323 | 0.068 | 25.010 | +0.761 | Formatted: Centered                                                        |
| 78  | 0.796 | 0.024 | 1.532 | 0.049 | 19.250 | 0.535 | 0.898 | 0.020 | 1.204 | 0.082 | 21.950 | +0.124 | Formatted: Centered                                                        |
| 79  | 0.817 | 0.031 | 1.586 | 0.047 | 19.210 | 0.135 | 0.892 | 0.028 | 1.267 | 0.080 | 21.390 | +0.471 | Formatted: Centered                                                        |
| 80  | 0.842 | 0.076 | 1.622 | 0.057 | 22.050 | 0.739 | 0.886 | 0.095 | 1.353 | 0.073 | 24.670 | +1.471 | Formatted: Centered                                                        |
| 81  | 0.756 | 0.043 | 1.623 | 0.043 | 18.860 | 0.161 | 0.795 | 0.048 | 1.342 | 0.105 | 21.300 | +0.691 | Formatted: Font: Times New Roman, 12 pt                                    |
| 83  | 0.679 | 0.103 | 1.814 | 0.054 | 23.440 | 0.547 | 0.764 | 0.103 | 1.610 | 0.076 | 26.390 | +1.151 | Formatted: Font: Times New Roman, 12 pt                                    |
| 96  | 0.909 | 0.032 | 1.791 | 0.055 | 20.290 | 0.161 | 0.899 | 0.032 | 1.389 | 0.041 | 23.090 | +0.491 | Formatted: Centered, Space Before: 0 pt, After: 0 pt, Don't keep with next |
| 97  | 0.885 | 0.022 | 1.723 | 0.049 | 20.260 | 0.204 | 0.916 | 0.022 | 1.418 | 0.082 | 22.850 | +0.371 | Formatted: Centered                                                        |
| 98  | 0.802 | 0.031 | 1.730 | 0.047 | 19.570 | 0.222 | 0.844 | 0.031 | 1.408 | 0.060 | 21.870 | +0.261 | Formatted: Centered                                                        |
| 99  | 0.931 | 0.030 | 1.688 | 0.045 | 18.580 | 0.136 | 0.891 | 0.026 | 1.336 | 0.064 | 20.550 | +0.341 | Formatted: Centered                                                        |
| 100 | 0.871 | 0.023 | 1.687 | 0.038 | 19.610 | 0.090 | 0.929 | 0.019 | 1.343 | 0.071 | 21.690 | +0.461 | Formatted: Centered                                                        |
| 101 | 0.906 | 0.020 | 1.639 | 0.045 | 20.320 | 0.208 | 0.985 | 0.019 | 1.326 | 0.074 | 24.200 | +0.241 | Formatted: Centered                                                        |
| 103 | 0.947 | 0.017 | 1.330 | 0.041 | 19.030 | 0.060 | 0.884 | 0.015 | 1.051 | 0.063 | 22.160 | +0.171 | Formatted: Centered                                                        |
| 104 | 0.854 | 0.024 | 1.624 | 0.047 | 18.190 | 0.047 | 0.968 | 0.021 | 1.289 | 0.074 | 21.210 | +0.121 | Formatted: Centered                                                        |
| 105 | 0.935 | 0.019 | 1.570 | 0.048 | 21.550 | 0.197 | 0.993 | 0.016 | 1.277 | 0.066 | 24.550 | +0.531 | Formatted: Centered                                                        |
| 106 | 0.828 | 0.020 | 1.537 | 0.055 | 18.290 | 0.204 | 0.863 | 0.017 | 1.141 | 0.053 | 21.000 | +0.141 | Formatted: Centered                                                        |
| 107 | 0.856 | 0.025 | 1.613 | 0.053 | 19.340 | 0.225 | 0.967 | 0.023 | 1.341 | 0.078 | 23.720 | +0.341 | Formatted: Centered                                                        |
| 108 | 0.918 | 0.023 | 1.717 | 0.053 | 18.450 | 0.244 | 0.959 | 0.021 | 1.381 | 0.075 | 21.270 | +0.871 | Formatted: Centered                                                        |
| 109 | 0.886 | 0.022 | 1.491 | 0.035 | 19.660 | 0.231 | 0.958 | 0.018 | 1.177 | 0.072 | 21.380 | +0.261 | Formatted: Centered                                                        |
| 110 | 0.912 | 0.027 | 1.615 | 0.043 | 20.790 | 0.185 | 0.953 | 0.021 | 1.282 | 0.082 | 23.880 | +0.351 | Formatted: Centered                                                        |
| 112 | 0.813 | 0.018 | 1.581 | 0.037 | 16.460 | 0.257 | 0.834 | 0.015 | 1.278 | 0.050 | 19.830 | +0.101 | Formatted: Centered                                                        |
| 113 | 0.535 | 0.030 | 1.816 | 0.039 | 12.260 | 0.123 | 0.665 | 0.028 | 1.760 | 0.127 | 14.940 | +0.251 | Formatted: Centered                                                        |
| 114 | 0.426 | 0.032 | 1.706 | 0.036 | 9.403  | 0.120 | 0.619 | 0.020 | 1.571 | 0.120 | 11.250 | +0.081 | Formatted: Centered                                                        |



|     |        |       |       |       |       |       |        |       |       |       |       |       |                     |
|-----|--------|-------|-------|-------|-------|-------|--------|-------|-------|-------|-------|-------|---------------------|
| 115 | 0.293  | 0.057 | 1.793 | 0.039 | 7.697 | 0.046 | 0.481  | 0.036 | 1.730 | 0.081 | 8.858 | 0.124 | Formatted: Centered |
| 116 | 0.100  | 0.388 | 1.550 | 0.038 | 6.513 | 0.294 | 0.524  | 0.065 | 1.588 | 0.086 | 8.107 | 0.321 | Formatted: Centered |
| 117 | 0.177  | 0.068 | 1.678 | 0.039 | 6.023 | 0.080 | 0.425  | 0.025 | 1.811 | 0.170 | 7.115 | 0.091 | Formatted: Centered |
| 118 | -0.021 | 0.433 | 1.584 | 0.048 | 5.307 | 0.079 | 0.413  | 0.018 | 1.828 | 0.144 | 6.400 | 0.041 | Formatted: Centered |
| 119 | -0.196 | 0.051 | 1.423 | 0.053 | 4.456 | 0.069 | 0.286  | 0.026 | 1.625 | 0.112 | 5.049 | 0.121 | Formatted: Centered |
| 120 | -0.375 | 0.027 | 1.272 | 0.056 | 3.629 | 0.035 | 0.119  | 0.062 | 1.507 | 0.117 | 3.808 | 0.061 | Formatted: Centered |
| 121 | -0.820 | 0.022 | 1.065 | 0.060 | 2.955 | 0.102 | -0.182 | 0.048 | 1.338 | 0.157 | 3.608 | 0.071 | Formatted: Centered |
| 122 | -1.707 | 0.010 | 0.674 | 0.026 | 1.668 | 0.097 | -1.034 | 0.010 | 0.917 | 0.079 | 2.034 | 0.091 | Formatted: Centered |

|    |       |       |       |       |        |       |       |       |       |       |        |       |                        |
|----|-------|-------|-------|-------|--------|-------|-------|-------|-------|-------|--------|-------|------------------------|
| 41 | 0.845 | 0.026 | 1.579 | 0.039 | 21.210 | 0.161 | 0.941 | 0.024 | 1.249 | 0.054 | 25.630 | 0.261 | Formatted: Font: 12 pt |
| 42 | 0.842 | 0.023 | 1.564 | 0.053 | 21.690 | 0.264 | 0.967 | 0.019 | 1.302 | 0.083 | 25.660 | 0.357 | Formatted: Font: 12 pt |
| 43 | 0.907 | 0.026 | 1.724 | 0.061 | 22.290 | 0.226 | 0.998 | 0.022 | 1.300 | 0.064 | 26.600 | 0.426 | Formatted: Font: 12 pt |
| 44 | 0.887 | 0.023 | 1.613 | 0.050 | 21.410 | 0.307 | 0.991 | 0.020 | 1.346 | 0.079 | 24.740 | 0.436 | Formatted: Font: 12 pt |
| 45 | 0.923 | 0.024 | 1.599 | 0.050 | 21.270 | 0.248 | 0.941 | 0.021 | 1.287 | 0.061 | 25.080 | 0.413 | Formatted: Font: 12 pt |
| 46 | 0.866 | 0.027 | 1.622 | 0.046 | 21.040 | 0.315 | 0.894 | 0.026 | 1.301 | 0.048 | 23.930 | 0.162 | Formatted: Font: 12 pt |
| 47 | 0.851 | 0.025 | 1.594 | 0.041 | 15.110 | 4.729 | 0.945 | 0.018 | 1.246 | 0.078 | 16.590 | 6.662 | Formatted: Font: 12 pt |
| 48 | 0.853 | 0.027 | 1.546 | 0.050 | 20.100 | 0.133 | 0.950 | 0.023 | 1.318 | 0.091 | 24.510 | 0.752 | Formatted: Font: 12 pt |
| 49 | 0.857 | 0.023 | 1.517 | 0.052 | 18.550 | 0.372 | 0.919 | 0.020 | 1.155 | 0.089 | 21.490 | 0.218 | Formatted: Font: 12 pt |
| 50 | 0.793 | 0.020 | 1.530 | 0.039 | 17.000 | 0.302 | 0.861 | 0.017 | 1.189 | 0.088 | 19.030 | 0.127 | Formatted: Font: 12 pt |
| 51 | 0.681 | 0.049 | 1.388 | 0.046 | 17.920 | 0.184 | 0.706 | 0.042 | 1.185 | 0.104 | 21.270 | 0.328 | Formatted: Font: 12 pt |
| 52 | 0.746 | 0.023 | 1.526 | 0.035 | 17.400 | 0.448 | 0.740 | 0.021 | 1.189 | 0.054 | 20.480 | 0.343 | Formatted: Font: 12 pt |
| 54 | 0.658 | 0.027 | 1.507 | 0.032 | 16.950 | 0.134 | 0.695 | 0.024 | 1.164 | 0.067 | 18.870 | 0.181 | Formatted: Font: 12 pt |
| 55 | 0.650 | 0.042 | 1.600 | 0.046 | 18.600 | 0.412 | 0.722 | 0.035 | 1.240 | 0.073 | 22.710 | 0.859 | Formatted: Font: 12 pt |
| 56 | 0.710 | 0.022 | 1.453 | 0.037 | 18.650 | 0.128 | 0.729 | 0.019 | 1.163 | 0.047 | 21.930 | 0.119 | Formatted: Font: 12 pt |

|    |       |       |       |       |        |       |       |       |       |       |        |       |                     |
|----|-------|-------|-------|-------|--------|-------|-------|-------|-------|-------|--------|-------|---------------------|
| 57 | 0.654 | 0.025 | 1.322 | 0.024 | 15.580 | 0.090 | 0.697 | 0.022 | 1.100 | 0.073 | 18.500 | 0.088 | Formatted ... [108] |
| 61 | 0.815 | 0.023 | 1.641 | 0.040 | 18.950 | 0.099 | 0.849 | 0.022 | 1.325 | 0.050 | 21.560 | 0.169 | Formatted ... [109] |
| 62 | 0.772 | 0.038 | 1.644 | 0.049 | 18.160 | 0.185 | 0.874 | 0.031 | 1.316 | 0.068 | 21.850 | 0.714 | Formatted ... [110] |
| 63 | 0.881 | 0.024 | 1.654 | 0.043 | 19.940 | 0.084 | 0.955 | 0.020 | 1.324 | 0.063 | 22.270 | 0.215 | Formatted ... [111] |
| 64 | 0.876 | 0.021 | 1.555 | 0.041 | 19.640 | 0.130 | 0.916 | 0.021 | 1.237 | 0.075 | 21.180 | 0.604 | Formatted ... [112] |
| 65 | 0.882 | 0.032 | 1.470 | 0.048 | 20.100 | 0.235 | 0.956 | 0.036 | 1.126 | 0.065 | 23.190 | 0.298 | Formatted ... [113] |
| 66 | 0.953 | 0.024 | 1.753 | 0.060 | 19.500 | 0.220 | 0.955 | 0.023 | 1.423 | 0.078 | 23.150 | 1.363 | Formatted ... [114] |
| 67 | 0.879 | 0.023 | 1.564 | 0.043 | 19.720 | 0.205 | 0.999 | 0.022 | 1.280 | 0.078 | 23.410 | 0.573 | Formatted ... [115] |
| 68 | 0.862 | 0.019 | 1.605 | 0.042 | 18.490 | 0.243 | 0.918 | 0.018 | 1.295 | 0.068 | 20.740 | 0.424 | Formatted ... [116] |
| 69 | 0.689 | 0.024 | 1.536 | 0.035 | 18.030 | 0.171 | 0.765 | 0.020 | 1.172 | 0.043 | 21.920 | 0.271 | Formatted ... [117] |
| 70 | 0.723 | 0.117 | 1.939 | 0.075 | 11.430 | 0.430 | 0.661 | 0.099 | 1.863 | 0.177 | 13.120 | 0.491 | Formatted ... [118] |
| 71 | 0.412 | 0.049 | 1.477 | 0.030 | 9.639  | 0.110 | 0.463 | 0.039 | 1.345 | 0.071 | 11.370 | 0.055 | Formatted ... [119] |
| 72 | 0.491 | 0.041 | 1.569 | 0.041 | 12.880 | 0.303 | 0.536 | 0.033 | 1.390 | 0.088 | 15.610 | 0.208 | Formatted ... [120] |
| 73 | 0.568 | 0.030 | 1.619 | 0.040 | 13.050 | 0.193 | 0.691 | 0.022 | 1.428 | 0.083 | 16.690 | 0.385 | Formatted ... [121] |
| 74 | 0.642 | 0.026 | 1.584 | 0.036 | 15.660 | 0.130 | 0.693 | 0.023 | 1.285 | 0.052 | 18.590 | 0.202 | Formatted ... [122] |
| 75 | 0.847 | 0.020 | 1.417 | 0.043 | 17.950 | 0.103 | 0.873 | 0.016 | 1.166 | 0.067 | 20.560 | 0.188 | Formatted ... [123] |
| 76 | 0.818 | 0.019 | 1.456 | 0.045 | 17.100 | 0.123 | 0.882 | 0.018 | 1.133 | 0.061 | 19.880 | 0.507 | Formatted ... [124] |
| 77 | 0.936 | 0.027 | 1.627 | 0.048 | 20.350 | 0.308 | 1.004 | 0.025 | 1.323 | 0.068 | 25.010 | 0.765 | Formatted ... [125] |
| 78 | 0.796 | 0.024 | 1.532 | 0.049 | 19.250 | 0.535 | 0.898 | 0.020 | 1.204 | 0.082 | 21.950 | 0.129 | Formatted ... [126] |
| 79 | 0.817 | 0.031 | 1.586 | 0.047 | 19.210 | 0.135 | 0.892 | 0.028 | 1.267 | 0.080 | 21.390 | 0.472 | Formatted ... [127] |
| 80 | 0.842 | 0.076 | 1.622 | 0.057 | 22.050 | 0.739 | 0.886 | 0.095 | 1.353 | 0.073 | 24.670 | 1.476 | Formatted ... [128] |
| 81 | 0.756 | 0.043 | 1.623 | 0.043 | 18.860 | 0.161 | 0.795 | 0.048 | 1.342 | 0.105 | 21.300 | 0.692 | Formatted ... [129] |
| 83 | 0.679 | 0.103 | 1.814 | 0.054 | 23.440 | 0.547 | 0.764 | 0.103 | 1.610 | 0.076 | 26.390 | 1.153 | Formatted ... [130] |
|    |       |       |       |       |        |       |       |       |       |       |        |       | Formatted ... [131] |
|    |       |       |       |       |        |       |       |       |       |       |        |       | Formatted ... [132] |
|    |       |       |       |       |        |       |       |       |       |       |        |       | Formatted ... [133] |
|    |       |       |       |       |        |       |       |       |       |       |        |       | Formatted ... [134] |
|    |       |       |       |       |        |       |       |       |       |       |        |       | Formatted ... [135] |
|    |       |       |       |       |        |       |       |       |       |       |        |       | Formatted ... [136] |
|    |       |       |       |       |        |       |       |       |       |       |        |       | Formatted ... [137] |
|    |       |       |       |       |        |       |       |       |       |       |        |       | Formatted ... [138] |
|    |       |       |       |       |        |       |       |       |       |       |        |       | Formatted ... [139] |
|    |       |       |       |       |        |       |       |       |       |       |        |       | Formatted ... [140] |
|    |       |       |       |       |        |       |       |       |       |       |        |       | Formatted ... [141] |
|    |       |       |       |       |        |       |       |       |       |       |        |       | Formatted ... [142] |
|    |       |       |       |       |        |       |       |       |       |       |        |       | Formatted ... [143] |
|    |       |       |       |       |        |       |       |       |       |       |        |       | Formatted ... [144] |
|    |       |       |       |       |        |       |       |       |       |       |        |       | Formatted ... [145] |
|    |       |       |       |       |        |       |       |       |       |       |        |       | Formatted ... [146] |
|    |       |       |       |       |        |       |       |       |       |       |        |       | Formatted ... [147] |
|    |       |       |       |       |        |       |       |       |       |       |        |       | Formatted ... [148] |
|    |       |       |       |       |        |       |       |       |       |       |        |       | Formatted ... [149] |
|    |       |       |       |       |        |       |       |       |       |       |        |       | Formatted ... [150] |
|    |       |       |       |       |        |       |       |       |       |       |        |       | Formatted ... [151] |
|    |       |       |       |       |        |       |       |       |       |       |        |       | Formatted ... [152] |
|    |       |       |       |       |        |       |       |       |       |       |        |       | Formatted ... [153] |
|    |       |       |       |       |        |       |       |       |       |       |        |       | Formatted ... [154] |

|     |        |       |       |       |        |       |        |       |       |       |        |       |
|-----|--------|-------|-------|-------|--------|-------|--------|-------|-------|-------|--------|-------|
| 96  | 0.909  | 0.032 | 1.791 | 0.055 | 20.290 | 0.161 | 0.899  | 0.032 | 1.389 | 0.041 | 23.090 | 0.491 |
| 97  | 0.885  | 0.022 | 1.723 | 0.049 | 20.260 | 0.204 | 0.916  | 0.022 | 1.418 | 0.082 | 22.850 | 0.374 |
| 98  | 0.802  | 0.031 | 1.730 | 0.047 | 19.570 | 0.222 | 0.844  | 0.031 | 1.408 | 0.060 | 21.870 | 0.269 |
| 99  | 0.931  | 0.030 | 1.688 | 0.045 | 18.580 | 0.136 | 0.891  | 0.026 | 1.336 | 0.064 | 20.550 | 0.341 |
| 100 | 0.871  | 0.023 | 1.687 | 0.038 | 19.610 | 0.090 | 0.929  | 0.019 | 1.343 | 0.071 | 21.690 | 0.461 |
| 101 | 0.906  | 0.020 | 1.639 | 0.045 | 20.320 | 0.208 | 0.985  | 0.019 | 1.326 | 0.074 | 24.200 | 0.241 |
| 103 | 0.947  | 0.017 | 1.330 | 0.041 | 19.030 | 0.060 | 0.884  | 0.015 | 1.051 | 0.063 | 22.160 | 0.179 |
| 104 | 0.854  | 0.024 | 1.624 | 0.047 | 18.190 | 0.047 | 0.968  | 0.021 | 1.289 | 0.074 | 21.210 | 0.126 |
| 105 | 0.935  | 0.019 | 1.570 | 0.048 | 21.550 | 0.197 | 0.993  | 0.016 | 1.277 | 0.066 | 24.550 | 0.530 |
| 106 | 0.828  | 0.020 | 1.537 | 0.055 | 18.290 | 0.204 | 0.863  | 0.017 | 1.141 | 0.053 | 21.000 | 0.146 |
| 107 | 0.856  | 0.025 | 1.613 | 0.053 | 19.340 | 0.225 | 0.967  | 0.023 | 1.341 | 0.078 | 23.720 | 0.341 |
| 108 | 0.918  | 0.023 | 1.717 | 0.053 | 18.450 | 0.244 | 0.959  | 0.021 | 1.381 | 0.075 | 21.270 | 0.874 |
| 109 | 0.886  | 0.022 | 1.491 | 0.035 | 19.660 | 0.231 | 0.958  | 0.018 | 1.177 | 0.072 | 21.380 | 0.262 |
| 110 | 0.912  | 0.027 | 1.615 | 0.043 | 20.790 | 0.185 | 0.953  | 0.021 | 1.282 | 0.082 | 23.880 | 0.355 |
| 112 | 0.813  | 0.018 | 1.581 | 0.037 | 16.460 | 0.257 | 0.834  | 0.015 | 1.278 | 0.050 | 19.830 | 0.105 |
| 113 | 0.535  | 0.030 | 1.816 | 0.039 | 12.260 | 0.123 | 0.665  | 0.028 | 1.760 | 0.127 | 14.940 | 0.252 |
| 114 | 0.426  | 0.032 | 1.706 | 0.036 | 9.403  | 0.120 | 0.619  | 0.020 | 1.571 | 0.120 | 11.250 | 0.087 |
| 115 | 0.293  | 0.057 | 1.793 | 0.039 | 7.697  | 0.046 | 0.481  | 0.036 | 1.730 | 0.081 | 8.858  | 0.124 |
| 116 | 0.100  | 0.388 | 1.550 | 0.038 | 6.513  | 0.294 | 0.524  | 0.065 | 1.588 | 0.086 | 8.107  | 0.325 |
| 117 | 0.177  | 0.068 | 1.678 | 0.039 | 6.023  | 0.080 | 0.425  | 0.025 | 1.811 | 0.170 | 7.115  | 0.090 |
| 118 | -0.021 | 0.433 | 1.584 | 0.048 | 5.307  | 0.079 | 0.413  | 0.018 | 1.828 | 0.144 | 6.400  | 0.046 |
| 119 | -0.196 | 0.051 | 1.423 | 0.053 | 4.456  | 0.069 | 0.286  | 0.026 | 1.625 | 0.112 | 5.049  | 0.126 |
| 120 | -0.375 | 0.027 | 1.272 | 0.056 | 3.629  | 0.035 | 0.119  | 0.062 | 1.507 | 0.117 | 3.808  | 0.062 |
| 121 | -0.820 | 0.022 | 1.065 | 0.060 | 2.955  | 0.102 | -0.182 | 0.048 | 1.338 | 0.157 | 3.608  | 0.074 |

- Formatted ... [155]
- Formatted ... [156]
- Formatted ... [157]
- Formatted ... [158]
- Formatted ... [159]
- Formatted ... [160]
- Formatted ... [161]
- Formatted ... [162]
- Formatted ... [163]
- Formatted ... [164]
- Formatted ... [165]
- Formatted ... [166]
- Formatted ... [167]
- Formatted ... [168]
- Formatted ... [169]
- Formatted ... [170]
- Formatted ... [171]
- Formatted ... [172]
- Formatted ... [173]
- Formatted ... [174]
- Formatted ... [175]
- Formatted ... [176]
- Formatted ... [177]
- Formatted ... [178]
- Formatted ... [179]
- Formatted ... [180]
- Formatted ... [181]
- Formatted ... [182]
- Formatted ... [183]
- Formatted ... [184]
- Formatted ... [185]
- Formatted ... [186]
- Formatted ... [187]
- Formatted ... [188]
- Formatted ... [189]
- Formatted ... [190]
- Formatted ... [191]
- Formatted ... [192]
- Formatted ... [193]
- Formatted ... [194]
- Formatted ... [195]
- Formatted ... [196]
- Formatted ... [197]
- Formatted ... [198]
- Formatted ... [199]
- Formatted ... [200]
- Formatted ... [201]
- Formatted ... [202]

|     |        |       |       |       |       |       |        |       |       |       |       |       |
|-----|--------|-------|-------|-------|-------|-------|--------|-------|-------|-------|-------|-------|
| 122 | -1.707 | 0.010 | 0.674 | 0.026 | 1.668 | 0.097 | -1.034 | 0.010 | 0.917 | 0.079 | 2.034 | 0.091 |
|-----|--------|-------|-------|-------|-------|-------|--------|-------|-------|-------|-------|-------|

Formatted: Font: 12 pt

Formatted

Formatted

|

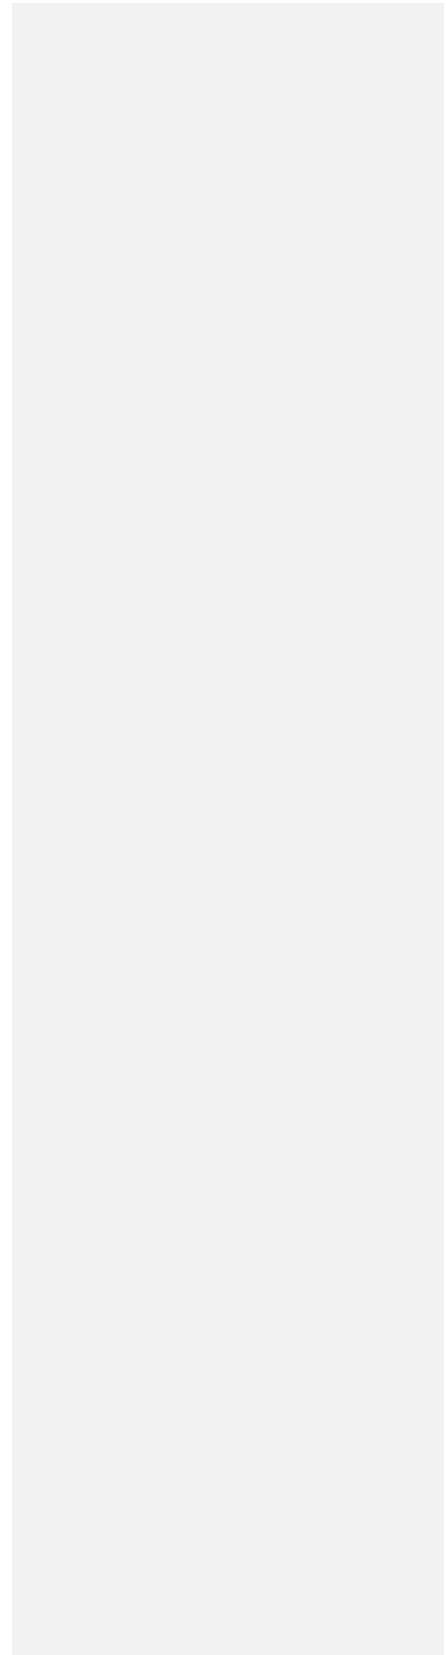

**Table S3.** Best-fit values of  $S^2$  and  $\tau_e$  and their errors obtained with MF analysis (note that both  $\tau_e$  and  $\tau_s$  are denoted as  $\tau_e$ ).

| <u>Res</u> | <u><math>S^2</math></u> | <u><math>\sigma_{S^2}</math></u> | <u><math>\tau_e</math></u> | <u><math>\sigma_{\tau_e}</math></u> |
|------------|-------------------------|----------------------------------|----------------------------|-------------------------------------|
| <u>2</u>   | <u>0.0900</u>           | <u>0.0057</u>                    | <u>0.5708</u>              | <u>0.0141</u>                       |
| <u>3</u>   | <u>0.0942</u>           | <u>0.0044</u>                    | <u>0.8128</u>              | <u>0.0159</u>                       |
| <u>4</u>   | <u>0.1339</u>           | <u>0.0037</u>                    | <u>0.8632</u>              | <u>0.0358</u>                       |
| <u>5</u>   | <u>0.1794</u>           | <u>0.0031</u>                    | <u>0.8821</u>              | <u>0.0280</u>                       |
| <u>7</u>   | <u>0.6920</u>           | <u>0.0102</u>                    | <u>0.0133</u>              | <u>0.0015</u>                       |
| <u>9</u>   | <u>0.7612</u>           | <u>0.0109</u>                    | <u>0.0000</u>              | <u>0.0000</u>                       |
| <u>10</u>  | <u>0.7713</u>           | <u>0.0061</u>                    | <u>0.0000</u>              | <u>0.0000</u>                       |
| <u>11</u>  | <u>0.6952</u>           | <u>0.0071</u>                    | <u>0.0000</u>              | <u>0.0000</u>                       |
| <u>12</u>  | <u>0.7676</u>           | <u>0.0058</u>                    | <u>0.0000</u>              | <u>0.0000</u>                       |
| <u>13</u>  | <u>0.7759</u>           | <u>0.0092</u>                    | <u>0.0000</u>              | <u>0.0000</u>                       |
| <u>14</u>  | <u>0.8360</u>           | <u>0.0060</u>                    | <u>0.0000</u>              | <u>0.0000</u>                       |
| <u>15</u>  | <u>0.6978</u>           | <u>0.0054</u>                    | <u>1.9726</u>              | <u>0.1896</u>                       |
| <u>16</u>  | <u>0.6342</u>           | <u>0.0107</u>                    | <u>2.4440</u>              | <u>0.3039</u>                       |
| <u>17</u>  | <u>0.3925</u>           | <u>0.0195</u>                    | <u>2.7946</u>              | <u>0.8457</u>                       |
| <u>18</u>  | <u>0.2756</u>           | <u>0.0063</u>                    | <u>1.3436</u>              | <u>0.0452</u>                       |
| <u>21</u>  | <u>0.2667</u>           | <u>0.0109</u>                    | <u>2.1859</u>              | <u>0.5151</u>                       |
| <u>23</u>  | <u>0.2662</u>           | <u>0.0081</u>                    | <u>1.8379</u>              | <u>0.4551</u>                       |
| <u>24</u>  | <u>0.2541</u>           | <u>0.0091</u>                    | <u>1.9294</u>              | <u>0.4740</u>                       |
| <u>25</u>  | <u>0.3041</u>           | <u>0.0071</u>                    | <u>1.8264</u>              | <u>0.3954</u>                       |
| <u>26</u>  | <u>0.1088</u>           | <u>0.0995</u>                    | <u>12.1583</u>             | <u>3.5300</u>                       |
| <u>27</u>  | <u>0.8360</u>           | <u>0.0094</u>                    | <u>0.0000</u>              | <u>0.0000</u>                       |
| <u>29</u>  | <u>0.7084</u>           | <u>0.0055</u>                    | <u>0.0000</u>              | <u>0.0000</u>                       |
| <u>30</u>  | <u>0.7732</u>           | <u>0.0143</u>                    | <u>0.0000</u>              | <u>0.0000</u>                       |
| <u>31</u>  | <u>0.8413</u>           | <u>0.0054</u>                    | <u>0.0000</u>              | <u>0.0000</u>                       |
| <u>32</u>  | <u>0.8581</u>           | <u>0.0063</u>                    | <u>0.0000</u>              | <u>0.0000</u>                       |
| <u>34</u>  | <u>0.8383</u>           | <u>0.0089</u>                    | <u>0.0000</u>              | <u>0.0000</u>                       |
| <u>36</u>  | <u>0.6060</u>           | <u>0.0366</u>                    | <u>3.4433</u>              | <u>0.9775</u>                       |
| <u>37</u>  | <u>0.5896</u>           | <u>0.0248</u>                    | <u>3.7763</u>              | <u>0.2995</u>                       |
| <u>39</u>  | <u>0.8397</u>           | <u>0.0071</u>                    | <u>0.0000</u>              | <u>0.0000</u>                       |
| <u>40</u>  | <u>0.8752</u>           | <u>0.0135</u>                    | <u>0.0000</u>              | <u>0.0000</u>                       |
| <u>41</u>  | <u>0.9131</u>           | <u>0.0079</u>                    | <u>0.0000</u>              | <u>0.0000</u>                       |
| <u>42</u>  | <u>0.9288</u>           | <u>0.0127</u>                    | <u>0.0000</u>              | <u>0.0000</u>                       |
| <u>43</u>  | <u>0.9574</u>           | <u>0.0116</u>                    | <u>0.0000</u>              | <u>0.0000</u>                       |
| <u>44</u>  | <u>0.9230</u>           | <u>0.0144</u>                    | <u>0.0000</u>              | <u>0.0000</u>                       |
| <u>45</u>  | <u>0.9190</u>           | <u>0.0129</u>                    | <u>0.0000</u>              | <u>0.0000</u>                       |
| <u>46</u>  | <u>0.8637</u>           | <u>0.0079</u>                    | <u>0.0000</u>              | <u>0.0000</u>                       |
| <u>47</u>  | <u>0.4974</u>           | <u>0.1577</u>                    | <u>4.4814</u>              | <u>1.5770</u>                       |

Field Code Changed ... [203]  
 Field Code Changed ... [204]  
 Field Code Changed ... [205]  
 Field Code Changed ... [206]  
 Field Code Changed ... [207]  
 Formatted ... [212]  
 Field Code Changed ... [213]  
 Field Code Changed ... [216]  
 Formatted ... [214]  
 Field Code Changed ... [215]  
 Field Code Changed ... [211]  
 Formatted ... [208]  
 Formatted ... [209]  
 Formatted Table ... [210]  
 Formatted ... [217]  
 Formatted ... [218]  
 Formatted ... [219]  
 Formatted ... [220]  
 Formatted ... [221]  
 Formatted ... [222]  
 Formatted ... [223]  
 Formatted ... [224]  
 Formatted ... [225]  
 Formatted ... [226]  
 Formatted ... [227]  
 Formatted ... [228]  
 Formatted ... [229]  
 Formatted ... [230]  
 Formatted ... [231]  
 Formatted ... [232]  
 Formatted ... [233]  
 Formatted ... [234]  
 Formatted ... [235]  
 Formatted ... [236]  
 Formatted ... [237]  
 Formatted ... [238]  
 Formatted ... [239]  
 Formatted ... [240]  
 Formatted ... [241]  
 Formatted ... [242]  
 Formatted ... [243]  
 Formatted ... [244]  
 Formatted ... [245]  
 Formatted ... [246]  
 Formatted ... [247]  
 Formatted ... [248]  
 Formatted ... [249]  
 Formatted ... [250]  
 Formatted ... [251]  
 Formatted ... [252]  
 Formatted ... [253]



|            |               |               |               |               |
|------------|---------------|---------------|---------------|---------------|
| <u>116</u> | <u>0.2160</u> | <u>0.0142</u> | <u>0.8510</u> | <u>0.0244</u> |
| <u>117</u> | <u>0.1718</u> | <u>0.0134</u> | <u>0.8047</u> | <u>0.3544</u> |
| <u>118</u> | <u>0.2226</u> | <u>0.0021</u> | <u>0.0221</u> | <u>0.0007</u> |
| <u>119</u> | <u>0.1284</u> | <u>0.0043</u> | <u>3.0862</u> | <u>0.4265</u> |
| <u>120</u> | <u>0.0872</u> | <u>0.0043</u> | <u>0.8044</u> | <u>0.0195</u> |
| <u>121</u> | <u>0.0817</u> | <u>0.0051</u> | <u>0.6269</u> | <u>0.0108</u> |
| <u>122</u> | <u>0.0432</u> | <u>0.0042</u> | <u>0.4985</u> | <u>0.0203</u> |

- Formatted: Centered
- Formatted





|     |         |         |        |        |           |
|-----|---------|---------|--------|--------|-----------|
| 61  | 5.388   | -11.491 | -0.357 | -1.063 | Formatted |
| 62  | -18.093 | -2.682  | -0.475 | -0.994 | Formatted |
| 64  | -46.942 | -11.728 | -0.491 | -1.174 | Formatted |
| 65  | -42.699 | -1.686  | -0.489 | -0.858 | Formatted |
| 66  | -5.881  | -39.048 | -0.489 | -1.127 | Formatted |
| 67  | -3.247  | -52.724 | -0.491 | -1.049 | Formatted |
| 68  | -5.077  | -4.241  | -0.438 | -1.049 | Formatted |
| 69  | -5.009  | -2.072  | -0.420 | -0.874 | Formatted |
| 70  | 2.156   | -6.873  | -0.330 | -1.010 | Formatted |
| 72  | -3.570  | -1.200  | -0.377 | -0.630 | Formatted |
| 73  | -0.638  | -1.363  | -0.186 | -0.555 | Formatted |
| 74  | -7.941  | -0.426  | -0.438 | -0.286 | Formatted |
| 75  | -5.041  | -2.017  | -0.419 | -0.865 | Formatted |
| 76  | -10.501 | -2.792  | -0.460 | -0.991 | Formatted |
| 77  | -15.973 | -2.140  | -0.471 | -0.928 | Formatted |
| 79  | -14.540 | -2.770  | -0.470 | -0.997 | Formatted |
| 80  | -3.970  | -3.380  | -0.420 | -0.998 | Formatted |
| 81  | -10.851 | -2.657  | -0.460 | -0.980 | Formatted |
| 97  | -35.617 | -44.324 | -0.493 | -1.208 | Formatted |
| 98  | -58.202 | -28.196 | -0.494 | -1.202 | Formatted |
| 99  | -68.164 | -3.544  | -0.493 | -1.066 | Formatted |
| 101 | -21.819 | -6.803  | -0.482 | -1.134 | Formatted |
| 104 | -27.229 | -29.881 | -0.490 | -1.200 | Formatted |
| 105 | -6.279  | -2.266  | -0.435 | -0.915 | Formatted |
| 106 | -20.608 | -5.968  | -0.480 | -1.121 | Formatted |
| 108 | -70.841 | -3.039  | -0.493 | -1.038 | Formatted |
| 109 | -40.130 | -4.350  | -0.489 | -1.093 | Formatted |
| 110 | -24.863 | -2.882  | -0.481 | -1.016 | Formatted |
| 112 | -20.929 | -2.207  | -0.478 | -0.943 | Formatted |
| 113 | 0.830   | -6.231  | -0.367 | -1.032 | Formatted |
| 115 | 5.121   | -10.319 | -0.321 | -1.029 | Formatted |
| 116 | -0.816  | -2.472  | -0.288 | -0.820 | Formatted |
| 117 | 16.690  | 21.869  | -0.052 | 0.836  | Formatted |
| 118 | 2.550   | -5.404  | -0.180 | -0.866 | Formatted |
| 119 | -0.202  | -1.897  | -0.176 | -0.659 | Formatted |

Formatted: Font: Times New Roman



|     |         |          |        |        |        |        |           |
|-----|---------|----------|--------|--------|--------|--------|-----------|
| 33  | 1.37E+7 | 1.66E+8  | -90.0  | -90.0  | -90.0  | -114.2 | Formatted |
| 37  | 8.42E+6 | 2.38E+8  | -90.0  | -90.0  | -90.0  | -119.4 | Formatted |
| 39  | 2.90E+7 | 2.52E+8  | -90.1  | -90.1  | -68.7  | -95.4  | Formatted |
| 41  | 7.63E+6 | 7.11E+10 | -94.3  | -71.7  | -60.1  | -80.4  | Formatted |
| 42  | 1.07E+7 | 5.57E+10 | -69.0  | -90.0  | -62.2  | -92.8  | Formatted |
| 43  | 1.38E+7 | 6.77E+10 | -85.1  | -71.0  | 69.0   | -98.2  | Formatted |
| 44  | 5.52E+6 | 2.72E+10 | -69.1  | -89.8  | -67.2  | -110.3 | Formatted |
| 45  | 7.76E+6 | 4.32E+10 | -93.9  | -109.8 | -61.6  | -95.1  | Formatted |
| 47  | 1.38E+7 | 6.25E+10 | -62.0  | -90.0  | -86.0  | -123.1 | Formatted |
| 48  | 1.20E+7 | 2.10E+10 | -89.0  | -115.2 | -65.8  | -102.2 | Formatted |
| 49  | 1.09E+7 | 3.66E+10 | -62.0  | -90.0  | -76.5  | -113.6 | Formatted |
| 51  | 2.48E+7 | 1.86E+10 | -90.0  | -90.0  | -90.0  | -77.2  | Formatted |
| 52  | 2.10E+6 | 1.26E+8  | -90.0  | -90.0  | -50.4  | -39.3  | Formatted |
| 54  | 5.19E+7 | 5.64E+7  | -90.0  | -90.0  | -89.9  | -57.2  | Formatted |
| 55  | 3.75E+7 | 3.31E+8  | -90.0  | -90.0  | -106.1 | -76.5  | Formatted |
| 56  | 4.24E+7 | 9.95E+7  | -90.0  | -90.0  | -83.9  | -65.3  | Formatted |
| 57  | 4.65E+7 | 7.44E+10 | -90.0  | -90.0  | -85.1  | -75.6  | Formatted |
| 61  | 2.63E+7 | 2.26E+8  | -90.0  | -90.0  | -88.2  | -107.9 | Formatted |
| 62  | 2.82E+7 | 2.28E+8  | -90.0  | -90.0  | -90.0  | -108.8 | Formatted |
| 64  | 1.37E+7 | 3.55E+10 | -65.5  | -89.6  | -78.0  | -110.9 | Formatted |
| 65  | 8.78E+6 | 4.15E+7  | -87.4  | -79.2  | -174.3 | -2.1   | Formatted |
| 66  | 1.16E+7 | 1.43E+13 | 0.0    | 0.0    | -179.9 | -34.1  | Formatted |
| 67  | 1.50E+6 | 6.67E+10 | 0.0    | 0.0    | -145.5 | -117.5 | Formatted |
| 68  | 2.71E+6 | 4.78E+11 | 0.0    | 0.0    | -88.9  | -115.3 | Formatted |
| 69  | 1.18E+7 | 8.27E+9  | 0.0    | 0.0    | -0.1   | 28.2   | Formatted |
| 70  | 5.12E+7 | 2.69E+8  | -90.0  | -90.0  | -94.2  | -114.6 | Formatted |
| 72  | 3.68E+7 | 1.62E+10 | -90.0  | -90.0  | -90.0  | -71.8  | Formatted |
| 73  | 2.32E+7 | 9.35E+8  | -90.0  | -90.0  | -90.0  | -71.0  | Formatted |
| 74  | 9.16E+6 | 4.93E+8  | -90.0  | -90.0  | -123.2 | -79.6  | Formatted |
| 75  | 1.39E+6 | 6.08E+9  | 0.0    | 0.0    | -1.3   | -115.4 | Formatted |
| 76  | 1.93E+7 | 1.70E+10 | 0.0    | 0.0    | 0.0    | -158.3 | Formatted |
| 77  | 9.77E+5 | 7.61E+9  | 0.0    | 0.0    | -181.8 | -118.5 | Formatted |
| 79  | 2.32E+7 | 2.11E+8  | -90.0  | -90.0  | -90.0  | -110.6 | Formatted |
| 80  | 1.58E+7 | 2.11E+8  | -90.0  | -90.0  | -90.0  | -110.0 | Formatted |
| 81  | 3.11E+7 | 2.27E+8  | -90.0  | -90.0  | -83.5  | -106.6 | Formatted |
| 97  | 1.86E+7 | 2.57E+8  | -90.0  | -90.2  | -70.4  | -103.3 | Formatted |
| 98  | 1.76E+7 | 4.28E+8  | -83.5  | -98.8  | -113.3 | -98.6  | Formatted |
| 99  | 1.67E+7 | 5.30E+8  | -62.0  | -90.0  | -90.0  | -115.3 | Formatted |
| 101 | 7.61E+6 | 1.27E+8  | -90.0  | -90.0  | -90.1  | -121.7 | Formatted |
| 104 | 3.14E+7 | 6.49E+10 | -89.9  | -115.4 | -66.4  | -89.4  | Formatted |
| 105 | 7.97E+6 | 7.33E+9  | -112.3 | -86.2  | -1.6   | -23.2  | Formatted |
| 106 | 6.25E+6 | 8.67E+7  | 0.0    | 0.0    | -39.1  | -120.1 | Formatted |
| 108 | 1.56E+6 | 4.91E+10 | 0.0    | 0.0    | -90.0  | -118.6 | Formatted |

|     |         |          |       |       |        |        |
|-----|---------|----------|-------|-------|--------|--------|
| 109 | 3.73E+6 | 7.76E+11 | 0.0   | 0.0   | -90.0  | -112.5 |
| 110 | 1.29E+6 | 3.51E+10 | 0.0   | 0.0   | -42.0  | -116.4 |
| 112 | 3.25E+7 | 1.33E+8  | -90.0 | -90.0 | -89.9  | -109.4 |
| 113 | 5.93E+7 | 1.79E+8  | -90.0 | -90.0 | -90.0  | -55.6  |
| 115 | 1.63E+8 | 3.77E+9  | -95.5 | -44.4 | -59.6  | -87.2  |
| 116 | 1.31E+8 | 7.00E+8  | 86.7  | -92.2 | -86.3  | -113.8 |
| 117 | 2.53E+7 | 2.67E+8  | -90.0 | -90.0 | 141.4  | -170.4 |
| 118 | 2.03E+8 | 1.69E+11 | 27.6  | 0.3   | -116.8 | -69.1  |
| 119 | 6.25E+7 | 1.17E+9  | -90.0 | -90.0 | -86.6  | -121.0 |

Formatted

Formatted

Formatted

Formatted

Formatted

Formatted

Formatted

Formatted

Formatted

Formatted: Font: Times New Roman

Formatted

Formatted: Left, Line spacing: single

|                                     |                       |                             |                                               |
|-------------------------------------|-----------------------|-----------------------------|-----------------------------------------------|
| <b>Page 13: [1] Formatted</b>       | <b>eva</b>            | <b>9/24/2012 6:36:00 AM</b> | Formatted                                     |
| <b>Page 13: [2] Formatted</b>       | <b>eva</b>            | <b>9/24/2012 6:36:00 AM</b> | Formatted                                     |
| <b>Page 13: [3] Formatted</b>       | <b>Mirzo Zerbetto</b> | <b>9/21/2012 5:10:00 PM</b> | Font: 12 pt                                   |
| <b>Page 13: [4] Formatted</b>       | <b>eva</b>            | <b>9/24/2012 6:36:00 AM</b> | Centered                                      |
| <b>Page 13: [5] Formatted Table</b> | <b>Mirzo Zerbetto</b> | <b>9/24/2012 8:36:00 AM</b> | Formatted Table                               |
| <b>Page 13: [6] Formatted</b>       | <b>Mirzo Zerbetto</b> | <b>9/21/2012 5:10:00 PM</b> | Font: 12 pt                                   |
| <b>Page 13: [7] Formatted</b>       | <b>eva</b>            | <b>9/24/2012 6:36:00 AM</b> | Centered                                      |
| <b>Page 13: [8] Change</b>          | <b>Unknown</b>        |                             | Field Code Changed                            |
| <b>Page 13: [9] Change</b>          | <b>Unknown</b>        |                             | Field Code Changed                            |
| <b>Page 13: [10] Formatted</b>      | <b>eva</b>            | <b>9/24/2012 6:36:00 AM</b> | Centered, Indent: Left: 0", Space After: 0 pt |
| <b>Page 13: [11] Change</b>         | <b>Unknown</b>        |                             | Field Code Changed                            |
| <b>Page 13: [12] Formatted</b>      | <b>eva</b>            | <b>9/24/2012 6:36:00 AM</b> | Centered                                      |
| <b>Page 13: [13] Change</b>         | <b>Unknown</b>        |                             | Field Code Changed                            |
| <b>Page 13: [14] Formatted</b>      | <b>eva</b>            | <b>9/24/2012 6:36:00 AM</b> | Centered, Indent: First line: 0"              |
| <b>Page 13: [15] Change</b>         | <b>Unknown</b>        |                             | Field Code Changed                            |
| <b>Page 13: [16] Formatted</b>      | <b>Mirzo Zerbetto</b> | <b>9/21/2012 5:10:00 PM</b> |                                               |



|                                |                       |                             |             |
|--------------------------------|-----------------------|-----------------------------|-------------|
| <b>Page 13: [32] Formatted</b> | <b>eva</b>            | <b>9/24/2012 6:36:00 AM</b> | Centered    |
| <b>Page 13: [33] Formatted</b> | <b>Mirzo Zerbetto</b> | <b>9/21/2012 5:10:00 PM</b> | Font: 12 pt |
| <b>Page 13: [34] Formatted</b> | <b>eva</b>            | <b>9/24/2012 6:36:00 AM</b> | Centered    |
| <b>Page 13: [35] Formatted</b> | <b>Mirzo Zerbetto</b> | <b>9/21/2012 5:10:00 PM</b> | Font: 12 pt |
| <b>Page 13: [36] Formatted</b> | <b>eva</b>            | <b>9/24/2012 6:36:00 AM</b> | Centered    |
| <b>Page 13: [37] Formatted</b> | <b>Mirzo Zerbetto</b> | <b>9/21/2012 5:10:00 PM</b> | Font: 12 pt |
| <b>Page 13: [38] Formatted</b> | <b>eva</b>            | <b>9/24/2012 6:36:00 AM</b> | Centered    |
| <b>Page 13: [39] Formatted</b> | <b>Mirzo Zerbetto</b> | <b>9/21/2012 5:10:00 PM</b> | Font: 12 pt |
| <b>Page 13: [40] Formatted</b> | <b>eva</b>            | <b>9/24/2012 6:36:00 AM</b> | Centered    |
| <b>Page 13: [41] Formatted</b> | <b>Mirzo Zerbetto</b> | <b>9/21/2012 5:10:00 PM</b> | Font: 12 pt |
| <b>Page 13: [42] Formatted</b> | <b>eva</b>            | <b>9/24/2012 6:36:00 AM</b> | Centered    |
| <b>Page 13: [43] Formatted</b> | <b>Mirzo Zerbetto</b> | <b>9/21/2012 5:10:00 PM</b> | Font: 12 pt |
| <b>Page 13: [44] Formatted</b> | <b>eva</b>            | <b>9/24/2012 6:36:00 AM</b> | Centered    |
| <b>Page 13: [45] Formatted</b> | <b>Mirzo Zerbetto</b> | <b>9/21/2012 5:10:00 PM</b> | Font: 12 pt |
| <b>Page 13: [46] Formatted</b> | <b>eva</b>            | <b>9/24/2012 6:36:00 AM</b> | Centered    |





Centered

**Page 14: [63] Formatted** **Mirzo Zerbetto** **9/21/2012 5:10:00 PM**

Font: 12 pt

**Page 14: [64] Formatted** **eva** **9/24/2012 6:36:00 AM**

Centered

**Page 14: [65] Formatted** **Mirzo Zerbetto** **9/21/2012 5:10:00 PM**

Font: 12 pt

**Page 14: [66] Formatted** **eva** **9/24/2012 6:36:00 AM**

Centered

**Page 14: [67] Formatted** **Mirzo Zerbetto** **9/21/2012 5:10:00 PM**

Font: 12 pt

**Page 14: [68] Formatted** **eva** **9/24/2012 6:36:00 AM**

Centered

**Page 14: [69] Formatted** **Mirzo Zerbetto** **9/21/2012 5:10:00 PM**

Font: 12 pt

**Page 14: [70] Formatted** **eva** **9/24/2012 6:36:00 AM**

Centered

**Page 14: [71] Formatted** **Mirzo Zerbetto** **9/21/2012 5:10:00 PM**

Font: 12 pt

**Page 14: [72] Formatted** **eva** **9/24/2012 6:36:00 AM**

Centered

**Page 14: [73] Formatted** **eva** **9/24/2012 6:36:00 AM**

Centered, Space Before: 0 pt, After: 0 pt, Don't keep with next

**Page 14: [74] Formatted** **Mirzo Zerbetto** **9/21/2012 5:10:00 PM**

Font: Times New Roman, 12 pt

**Page 14: [75] Formatted** **Mirzo Zerbetto** **9/21/2012 5:10:00 PM**

Font: 12 pt

**Page 14: [76] Formatted** **Mirzo Zerbetto** **9/21/2012 5:10:00 PM**

Font: Times New Roman, 12 pt

**Page 14: [77] Formatted** **Mirzo Zerbetto** **9/21/2012 5:10:00 PM**

Font: 12 pt

**Page 14: [78] Formatted** **Mirzo Zerbetto** **9/21/2012 5:10:00 PM**

Font: Times New Roman, 12 pt

**Page 14: [79] Formatted** **Mirzo Zerbetto** **9/21/2012 5:10:00 PM**

Font: 12 pt

**Page 14: [80] Formatted** **Mirzo Zerbetto** **9/21/2012 5:10:00 PM**

Font: Times New Roman, 12 pt

**Page 14: [81] Formatted** **Mirzo Zerbetto** **9/21/2012 5:10:00 PM**

Font: 12 pt

**Page 14: [82] Formatted** **eva** **9/24/2012 6:36:00 AM**

Centered

**Page 14: [83] Formatted** **Mirzo Zerbetto** **9/21/2012 5:10:00 PM**

Font: 12 pt

**Page 14: [84] Formatted** **eva** **9/24/2012 6:36:00 AM**

Centered

**Page 14: [85] Formatted** **Mirzo Zerbetto** **9/21/2012 5:10:00 PM**

Font: 12 pt

**Page 14: [86] Formatted** **eva** **9/24/2012 6:36:00 AM**

Centered

**Page 14: [87] Formatted** **Mirzo Zerbetto** **9/21/2012 5:10:00 PM**

Font: 12 pt

**Page 14: [88] Formatted** **eva** **9/24/2012 6:36:00 AM**

Centered

**Page 14: [89] Formatted** **Mirzo Zerbetto** **9/21/2012 5:10:00 PM**

Font: 12 pt

**Page 14: [90] Formatted** **eva** **9/24/2012 6:36:00 AM**

Centered

**Page 14: [91] Formatted** **Mirzo Zerbetto** **9/21/2012 5:10:00 PM**

Font: 12 pt

**Page 14: [92] Formatted** **eva** **9/24/2012 6:36:00 AM**

Centered

|                                 |                       |                             |             |
|---------------------------------|-----------------------|-----------------------------|-------------|
| <b>Page 14: [93] Formatted</b>  | <b>Mirzo Zerbetto</b> | <b>9/21/2012 5:10:00 PM</b> | Font: 12 pt |
| <b>Page 14: [94] Formatted</b>  | <b>eva</b>            | <b>9/24/2012 6:36:00 AM</b> | Centered    |
| <b>Page 14: [95] Formatted</b>  | <b>Mirzo Zerbetto</b> | <b>9/21/2012 5:10:00 PM</b> | Font: 12 pt |
| <b>Page 14: [96] Formatted</b>  | <b>eva</b>            | <b>9/24/2012 6:36:00 AM</b> | Centered    |
| <b>Page 14: [97] Formatted</b>  | <b>Mirzo Zerbetto</b> | <b>9/21/2012 5:10:00 PM</b> | Font: 12 pt |
| <b>Page 14: [98] Formatted</b>  | <b>eva</b>            | <b>9/24/2012 6:36:00 AM</b> | Centered    |
| <b>Page 14: [99] Formatted</b>  | <b>Mirzo Zerbetto</b> | <b>9/21/2012 5:10:00 PM</b> | Font: 12 pt |
| <b>Page 14: [100] Formatted</b> | <b>eva</b>            | <b>9/24/2012 6:36:00 AM</b> | Centered    |
| <b>Page 14: [101] Formatted</b> | <b>eva</b>            | <b>9/24/2012 6:36:00 AM</b> | Centered    |
| <b>Page 14: [102] Formatted</b> | <b>eva</b>            | <b>9/24/2012 6:36:00 AM</b> | Centered    |
| <b>Page 14: [103] Formatted</b> | <b>eva</b>            | <b>9/24/2012 6:36:00 AM</b> | Centered    |
| <b>Page 14: [104] Formatted</b> | <b>eva</b>            | <b>9/24/2012 6:36:00 AM</b> | Centered    |
| <b>Page 14: [105] Formatted</b> | <b>eva</b>            | <b>9/24/2012 6:36:00 AM</b> | Centered    |
| <b>Page 14: [106] Formatted</b> | <b>eva</b>            | <b>9/24/2012 6:36:00 AM</b> | Centered    |
| <b>Page 14: [107] Formatted</b> | <b>eva</b>            | <b>9/24/2012 6:36:00 AM</b> | Centered    |
| <b>Page 18: [108] Formatted</b> | <b>Mirzo Zerbetto</b> | <b>9/21/2012 5:10:00 PM</b> |             |



**Page 18: [124] Formatted** **Mirzo Zerbetto** **9/21/2012 5:10:00 PM**

Font: 12 pt

**Page 18: [125] Formatted** **eva** **9/24/2012 6:36:00 AM**

Formatted

**Page 18: [126] Formatted** **Mirzo Zerbetto** **9/21/2012 5:10:00 PM**

Font: 12 pt

**Page 18: [127] Formatted** **eva** **9/24/2012 6:36:00 AM**

Formatted

**Page 18: [128] Formatted** **Mirzo Zerbetto** **9/21/2012 5:10:00 PM**

Font: 12 pt

**Page 18: [129] Formatted** **eva** **9/24/2012 6:36:00 AM**

Formatted

**Page 18: [130] Formatted** **Mirzo Zerbetto** **9/21/2012 5:10:00 PM**

Font: 12 pt

**Page 18: [131] Formatted** **eva** **9/24/2012 6:36:00 AM**

Formatted

**Page 18: [132] Formatted** **Mirzo Zerbetto** **9/21/2012 5:10:00 PM**

Font: 12 pt

**Page 18: [133] Formatted** **eva** **9/24/2012 6:36:00 AM**

Formatted

**Page 18: [134] Formatted** **Mirzo Zerbetto** **9/21/2012 5:10:00 PM**

Font: 12 pt

**Page 18: [135] Formatted** **eva** **9/24/2012 6:36:00 AM**

Formatted

**Page 18: [136] Formatted** **Mirzo Zerbetto** **9/21/2012 5:10:00 PM**

Font: 12 pt

**Page 18: [137] Formatted** **eva** **9/24/2012 6:36:00 AM**

Formatted

**Page 18: [138] Formatted** **Mirzo Zerbetto** **9/21/2012 5:10:00 PM**

Font: 12 pt

|                          |                |                      |                  |
|--------------------------|----------------|----------------------|------------------|
| Page 18: [139] Formatted | eva            | 9/24/2012 6:36:00 AM | Formatted        |
| Page 18: [140] Formatted | Mirzo Zerbetto | 9/21/2012 5:10:00 PM | Font: 12 pt      |
| Page 18: [141] Formatted | eva            | 9/24/2012 6:36:00 AM | Formatted        |
| Page 18: [142] Formatted | Mirzo Zerbetto | 9/21/2012 5:10:00 PM | Font: 12 pt      |
| Page 18: [143] Formatted | eva            | 9/24/2012 6:36:00 AM | Formatted        |
| Page 18: [144] Formatted | Mirzo Zerbetto | 9/21/2012 5:10:00 PM | Font: 12 pt      |
| Page 18: [145] Formatted | eva            | 9/24/2012 6:36:00 AM | Formatted        |
| Page 18: [146] Formatted | Mirzo Zerbetto | 9/21/2012 5:10:00 PM | Font: 12 pt      |
| Page 18: [147] Formatted | eva            | 9/24/2012 6:36:00 AM | Formatted        |
| Page 18: [148] Formatted | Mirzo Zerbetto | 9/21/2012 5:10:00 PM | Font: 12 pt      |
| Page 18: [149] Formatted | eva            | 9/24/2012 6:36:00 AM | Formatted        |
| Page 18: [150] Formatted | eva            | 9/24/2012 6:36:00 AM | Indent: Left: 0" |
| Page 18: [151] Formatted | Mirzo Zerbetto | 9/21/2012 5:10:00 PM | Font: 12 pt      |
| Page 18: [152] Formatted | eva            | 9/24/2012 6:36:00 AM | Formatted        |
| Page 18: [153] Formatted | Mirzo Zerbetto | 9/21/2012 5:10:00 PM | Font: 12 pt      |
| Page 18: [154] Formatted | eva            | 9/24/2012 6:36:00 AM |                  |

Formatted

**Page 19: [155] Formatted** **Mirzo Zerbetto** **9/21/2012 5:10:00 PM**

Font: 12 pt

**Page 19: [156] Formatted** **eva** **9/24/2012 6:36:00 AM**

Formatted

**Page 19: [157] Formatted** **Mirzo Zerbetto** **9/21/2012 5:10:00 PM**

Font: 12 pt

**Page 19: [158] Formatted** **eva** **9/24/2012 6:36:00 AM**

Formatted

**Page 19: [159] Formatted** **Mirzo Zerbetto** **9/21/2012 5:10:00 PM**

Font: 12 pt

**Page 19: [160] Formatted** **eva** **9/24/2012 6:36:00 AM**

Formatted

**Page 19: [161] Formatted** **Mirzo Zerbetto** **9/21/2012 5:10:00 PM**

Font: 12 pt

**Page 19: [162] Formatted** **eva** **9/24/2012 6:36:00 AM**

Formatted

**Page 19: [163] Formatted** **Mirzo Zerbetto** **9/21/2012 5:10:00 PM**

Font: 12 pt

**Page 19: [164] Formatted** **eva** **9/24/2012 6:36:00 AM**

Formatted

**Page 19: [165] Formatted** **Mirzo Zerbetto** **9/21/2012 5:10:00 PM**

Font: 12 pt

**Page 19: [166] Formatted** **eva** **9/24/2012 6:36:00 AM**

Formatted

**Page 19: [167] Formatted** **Mirzo Zerbetto** **9/21/2012 5:10:00 PM**

Font: 12 pt

**Page 19: [168] Formatted** **eva** **9/24/2012 6:36:00 AM**

Formatted

**Page 19: [169] Formatted** **Mirzo Zerbetto** **9/21/2012 5:10:00 PM**

Font: 12 pt



|                          |                |                      |             |
|--------------------------|----------------|----------------------|-------------|
| Page 19: [170] Formatted | eva            | 9/24/2012 6:36:00 AM | Formatted   |
| Page 19: [171] Formatted | Mirzo Zerbetto | 9/21/2012 5:10:00 PM | Font: 12 pt |
| Page 19: [172] Formatted | eva            | 9/24/2012 6:36:00 AM | Formatted   |
| Page 19: [173] Formatted | Mirzo Zerbetto | 9/21/2012 5:10:00 PM | Font: 12 pt |
| Page 19: [174] Formatted | eva            | 9/24/2012 6:36:00 AM | Formatted   |
| Page 19: [175] Formatted | Mirzo Zerbetto | 9/21/2012 5:10:00 PM | Font: 12 pt |
| Page 19: [176] Formatted | eva            | 9/24/2012 6:36:00 AM | Formatted   |
| Page 19: [177] Formatted | Mirzo Zerbetto | 9/21/2012 5:10:00 PM | Font: 12 pt |
| Page 19: [178] Formatted | eva            | 9/24/2012 6:36:00 AM | Formatted   |
| Page 19: [179] Formatted | Mirzo Zerbetto | 9/21/2012 5:10:00 PM | Font: 12 pt |
| Page 19: [180] Formatted | eva            | 9/24/2012 6:36:00 AM | Formatted   |
| Page 19: [181] Formatted | Mirzo Zerbetto | 9/21/2012 5:10:00 PM | Font: 12 pt |
| Page 19: [182] Formatted | eva            | 9/24/2012 6:36:00 AM | Formatted   |
| Page 19: [183] Formatted | Mirzo Zerbetto | 9/21/2012 5:10:00 PM | Font: 12 pt |
| Page 19: [184] Formatted | eva            | 9/24/2012 6:36:00 AM | Formatted   |

|                                 |                       |                             |             |
|---------------------------------|-----------------------|-----------------------------|-------------|
| <b>Page 19: [185] Formatted</b> | <b>Mirzo Zerbetto</b> | <b>9/21/2012 5:10:00 PM</b> | Font: 12 pt |
| <b>Page 19: [186] Formatted</b> | <b>eva</b>            | <b>9/24/2012 6:36:00 AM</b> | Formatted   |
| <b>Page 19: [187] Formatted</b> | <b>Mirzo Zerbetto</b> | <b>9/21/2012 5:10:00 PM</b> | Font: 12 pt |
| <b>Page 19: [188] Formatted</b> | <b>eva</b>            | <b>9/24/2012 6:36:00 AM</b> | Formatted   |
| <b>Page 19: [189] Formatted</b> | <b>Mirzo Zerbetto</b> | <b>9/21/2012 5:10:00 PM</b> | Font: 12 pt |
| <b>Page 19: [190] Formatted</b> | <b>eva</b>            | <b>9/24/2012 6:36:00 AM</b> | Formatted   |
| <b>Page 19: [191] Formatted</b> | <b>Mirzo Zerbetto</b> | <b>9/21/2012 5:10:00 PM</b> | Font: 12 pt |
| <b>Page 19: [192] Formatted</b> | <b>eva</b>            | <b>9/24/2012 6:36:00 AM</b> | Formatted   |
| <b>Page 19: [193] Formatted</b> | <b>Mirzo Zerbetto</b> | <b>9/21/2012 5:10:00 PM</b> | Font: 12 pt |
| <b>Page 19: [194] Formatted</b> | <b>eva</b>            | <b>9/24/2012 6:36:00 AM</b> | Formatted   |
| <b>Page 19: [195] Formatted</b> | <b>Mirzo Zerbetto</b> | <b>9/21/2012 5:10:00 PM</b> | Font: 12 pt |
| <b>Page 19: [196] Formatted</b> | <b>eva</b>            | <b>9/24/2012 6:36:00 AM</b> | Formatted   |
| <b>Page 19: [197] Formatted</b> | <b>Mirzo Zerbetto</b> | <b>9/21/2012 5:10:00 PM</b> | Font: 12 pt |
| <b>Page 19: [198] Formatted</b> | <b>eva</b>            | <b>9/24/2012 6:36:00 AM</b> | Formatted   |
| <b>Page 19: [199] Formatted</b> | <b>Mirzo Zerbetto</b> | <b>9/21/2012 5:10:00 PM</b> | Font: 12 pt |
| <b>Page 19: [200] Formatted</b> | <b>eva</b>            | <b>9/24/2012 6:36:00 AM</b> |             |

Formatted

**Page 19: [201] Formatted** **Mirzo Zerbetto** **9/21/2012 5:10:00 PM**

Font: 12 pt

**Page 19: [202] Formatted** **eva** **9/24/2012 6:36:00 AM**

Formatted

**Page 22: [203] Change** **Unknown**

Field Code Changed

**Page 22: [204] Change** **Unknown**

Field Code Changed

**Page 22: [205] Change** **Unknown**

Field Code Changed

**Page 22: [206] Change** **Unknown**

Field Code Changed

**Page 22: [207] Change** **Unknown**

Field Code Changed

**Page 22: [208] Formatted** **Mirzo Zerbetto** **9/21/2012 5:10:00 PM**

Font: Bold

**Page 22: [209] Formatted** **eva** **9/24/2012 6:36:00 AM**

Centered

**Page 22: [210] Formatted Table** **Mirzo Zerbetto** **9/21/2012 8:53:00 AM**

Formatted Table

**Page 22: [211] Change** **Unknown**

Field Code Changed

**Page 22: [212] Formatted** **eva** **9/24/2012 6:36:00 AM**

Centered, Line spacing: single

**Page 22: [213] Change** **Unknown**

Field Code Changed

**Page 22: [214] Formatted** **eva** **9/24/2012 6:36:00 AM**

Centered

**Page 22: [215] Change** **Unknown**

Field Code Changed

|                              |                |  |
|------------------------------|----------------|--|
| <b>Page 22: [216] Change</b> | <b>Unknown</b> |  |
|------------------------------|----------------|--|

Field Code Changed

|                                 |            |                             |
|---------------------------------|------------|-----------------------------|
| <b>Page 22: [217] Formatted</b> | <b>eva</b> | <b>9/24/2012 6:36:00 AM</b> |
|---------------------------------|------------|-----------------------------|

Centered

|                                 |            |                             |
|---------------------------------|------------|-----------------------------|
| <b>Page 22: [218] Formatted</b> | <b>eva</b> | <b>9/24/2012 6:36:00 AM</b> |
|---------------------------------|------------|-----------------------------|

Centered

|                                 |            |                             |
|---------------------------------|------------|-----------------------------|
| <b>Page 22: [219] Formatted</b> | <b>eva</b> | <b>9/24/2012 6:36:00 AM</b> |
|---------------------------------|------------|-----------------------------|

Centered

|                                 |            |                             |
|---------------------------------|------------|-----------------------------|
| <b>Page 22: [220] Formatted</b> | <b>eva</b> | <b>9/24/2012 6:36:00 AM</b> |
|---------------------------------|------------|-----------------------------|

Centered

|                                 |            |                             |
|---------------------------------|------------|-----------------------------|
| <b>Page 22: [221] Formatted</b> | <b>eva</b> | <b>9/24/2012 6:36:00 AM</b> |
|---------------------------------|------------|-----------------------------|

Centered

|                                 |            |                             |
|---------------------------------|------------|-----------------------------|
| <b>Page 22: [222] Formatted</b> | <b>eva</b> | <b>9/24/2012 6:36:00 AM</b> |
|---------------------------------|------------|-----------------------------|

Centered

|                                 |            |                             |
|---------------------------------|------------|-----------------------------|
| <b>Page 22: [223] Formatted</b> | <b>eva</b> | <b>9/24/2012 6:36:00 AM</b> |
|---------------------------------|------------|-----------------------------|

Centered

|                                 |            |                             |
|---------------------------------|------------|-----------------------------|
| <b>Page 22: [224] Formatted</b> | <b>eva</b> | <b>9/24/2012 6:36:00 AM</b> |
|---------------------------------|------------|-----------------------------|

Centered

|                                 |            |                             |
|---------------------------------|------------|-----------------------------|
| <b>Page 22: [225] Formatted</b> | <b>eva</b> | <b>9/24/2012 6:36:00 AM</b> |
|---------------------------------|------------|-----------------------------|

Centered

|                                 |            |                             |
|---------------------------------|------------|-----------------------------|
| <b>Page 22: [226] Formatted</b> | <b>eva</b> | <b>9/24/2012 6:36:00 AM</b> |
|---------------------------------|------------|-----------------------------|

Centered

|                                 |            |                             |
|---------------------------------|------------|-----------------------------|
| <b>Page 22: [227] Formatted</b> | <b>eva</b> | <b>9/24/2012 6:36:00 AM</b> |
|---------------------------------|------------|-----------------------------|

Centered

|                                 |            |                             |
|---------------------------------|------------|-----------------------------|
| <b>Page 22: [228] Formatted</b> | <b>eva</b> | <b>9/24/2012 6:36:00 AM</b> |
|---------------------------------|------------|-----------------------------|

Centered

|                                 |            |                             |
|---------------------------------|------------|-----------------------------|
| <b>Page 22: [229] Formatted</b> | <b>eva</b> | <b>9/24/2012 6:36:00 AM</b> |
|---------------------------------|------------|-----------------------------|

Centered

|                                 |            |                             |
|---------------------------------|------------|-----------------------------|
| <b>Page 22: [230] Formatted</b> | <b>eva</b> | <b>9/24/2012 6:36:00 AM</b> |
|---------------------------------|------------|-----------------------------|

Centered

|                                 |            |                             |          |
|---------------------------------|------------|-----------------------------|----------|
| <b>Page 22: [231] Formatted</b> | <b>eva</b> | <b>9/24/2012 6:36:00 AM</b> | Centered |
| <b>Page 22: [232] Formatted</b> | <b>eva</b> | <b>9/24/2012 6:36:00 AM</b> | Centered |
| <b>Page 22: [233] Formatted</b> | <b>eva</b> | <b>9/24/2012 6:36:00 AM</b> | Centered |
| <b>Page 22: [234] Formatted</b> | <b>eva</b> | <b>9/24/2012 6:36:00 AM</b> | Centered |
| <b>Page 22: [235] Formatted</b> | <b>eva</b> | <b>9/24/2012 6:36:00 AM</b> | Centered |
| <b>Page 22: [236] Formatted</b> | <b>eva</b> | <b>9/24/2012 6:36:00 AM</b> | Centered |
| <b>Page 22: [237] Formatted</b> | <b>eva</b> | <b>9/24/2012 6:36:00 AM</b> | Centered |
| <b>Page 22: [238] Formatted</b> | <b>eva</b> | <b>9/24/2012 6:36:00 AM</b> | Centered |
| <b>Page 22: [239] Formatted</b> | <b>eva</b> | <b>9/24/2012 6:36:00 AM</b> | Centered |
| <b>Page 22: [240] Formatted</b> | <b>eva</b> | <b>9/24/2012 6:36:00 AM</b> | Centered |
| <b>Page 22: [241] Formatted</b> | <b>eva</b> | <b>9/24/2012 6:36:00 AM</b> | Centered |
| <b>Page 22: [242] Formatted</b> | <b>eva</b> | <b>9/24/2012 6:36:00 AM</b> | Centered |
| <b>Page 22: [243] Formatted</b> | <b>eva</b> | <b>9/24/2012 6:36:00 AM</b> | Centered |
| <b>Page 22: [244] Formatted</b> | <b>eva</b> | <b>9/24/2012 6:36:00 AM</b> | Centered |
| <b>Page 22: [245] Formatted</b> | <b>eva</b> | <b>9/24/2012 6:36:00 AM</b> | Centered |
| <b>Page 22: [246] Formatted</b> | <b>eva</b> | <b>9/24/2012 6:36:00 AM</b> | Centered |

Centered

|                                 |            |                             |
|---------------------------------|------------|-----------------------------|
| <b>Page 22: [247] Formatted</b> | <b>eva</b> | <b>9/24/2012 6:36:00 AM</b> |
|---------------------------------|------------|-----------------------------|

Centered

|                                 |            |                             |
|---------------------------------|------------|-----------------------------|
| <b>Page 22: [248] Formatted</b> | <b>eva</b> | <b>9/24/2012 6:36:00 AM</b> |
|---------------------------------|------------|-----------------------------|

Centered

|                                 |            |                             |
|---------------------------------|------------|-----------------------------|
| <b>Page 22: [249] Formatted</b> | <b>eva</b> | <b>9/24/2012 6:36:00 AM</b> |
|---------------------------------|------------|-----------------------------|

Centered

|                                 |            |                             |
|---------------------------------|------------|-----------------------------|
| <b>Page 22: [250] Formatted</b> | <b>eva</b> | <b>9/24/2012 6:36:00 AM</b> |
|---------------------------------|------------|-----------------------------|

Centered

|                                 |            |                             |
|---------------------------------|------------|-----------------------------|
| <b>Page 22: [251] Formatted</b> | <b>eva</b> | <b>9/24/2012 6:36:00 AM</b> |
|---------------------------------|------------|-----------------------------|

Centered

|                                 |            |                             |
|---------------------------------|------------|-----------------------------|
| <b>Page 22: [252] Formatted</b> | <b>eva</b> | <b>9/24/2012 6:36:00 AM</b> |
|---------------------------------|------------|-----------------------------|

Centered

|                                 |            |                             |
|---------------------------------|------------|-----------------------------|
| <b>Page 22: [253] Formatted</b> | <b>eva</b> | <b>9/24/2012 6:36:00 AM</b> |
|---------------------------------|------------|-----------------------------|

Centered

|                                 |                       |                             |
|---------------------------------|-----------------------|-----------------------------|
| <b>Page 27: [254] Formatted</b> | <b>Mirzo Zerbetto</b> | <b>9/21/2012 5:10:00 PM</b> |
|---------------------------------|-----------------------|-----------------------------|

Font: (Default) Times New Roman

|                                 |                       |                             |
|---------------------------------|-----------------------|-----------------------------|
| <b>Page 27: [254] Formatted</b> | <b>Mirzo Zerbetto</b> | <b>9/21/2012 5:10:00 PM</b> |
|---------------------------------|-----------------------|-----------------------------|

Font: (Default) Times New Roman

|                                 |                       |                             |
|---------------------------------|-----------------------|-----------------------------|
| <b>Page 27: [254] Formatted</b> | <b>Mirzo Zerbetto</b> | <b>9/21/2012 5:10:00 PM</b> |
|---------------------------------|-----------------------|-----------------------------|

Font: (Default) Times New Roman

|                                 |                       |                             |
|---------------------------------|-----------------------|-----------------------------|
| <b>Page 27: [255] Formatted</b> | <b>Mirzo Zerbetto</b> | <b>9/21/2012 5:10:00 PM</b> |
|---------------------------------|-----------------------|-----------------------------|

Font: (Default) Times New Roman

|                                 |                       |                             |
|---------------------------------|-----------------------|-----------------------------|
| <b>Page 27: [255] Formatted</b> | <b>Mirzo Zerbetto</b> | <b>9/21/2012 5:10:00 PM</b> |
|---------------------------------|-----------------------|-----------------------------|

Font: (Default) Times New Roman

|                                 |                       |                             |
|---------------------------------|-----------------------|-----------------------------|
| <b>Page 27: [255] Formatted</b> | <b>Mirzo Zerbetto</b> | <b>9/21/2012 5:10:00 PM</b> |
|---------------------------------|-----------------------|-----------------------------|

Font: (Default) Times New Roman

|                                 |                       |                             |
|---------------------------------|-----------------------|-----------------------------|
| <b>Page 27: [256] Formatted</b> | <b>Mirzo Zerbetto</b> | <b>9/21/2012 5:10:00 PM</b> |
|---------------------------------|-----------------------|-----------------------------|

Font: (Default) Times New Roman

|                                 |                       |                             |
|---------------------------------|-----------------------|-----------------------------|
| <b>Page 27: [256] Formatted</b> | <b>Mirzo Zerbetto</b> | <b>9/21/2012 5:10:00 PM</b> |
|---------------------------------|-----------------------|-----------------------------|

Font: (Default) Times New Roman

**Page 27: [256] Formatted** **Mirzo Zerbetto** **9/21/2012 5:10:00 PM**

Font: (Default) Times New Roman

**Page 27: [257] Formatted** **Mirzo Zerbetto** **9/21/2012 5:10:00 PM**

Font: (Default) Times New Roman

**Page 27: [257] Formatted** **Mirzo Zerbetto** **9/21/2012 5:10:00 PM**

Font: (Default) Times New Roman

**Page 27: [257] Formatted** **Mirzo Zerbetto** **9/21/2012 5:10:00 PM**

Font: (Default) Times New Roman

**Page 27: [257] Formatted** **Mirzo Zerbetto** **9/21/2012 5:10:00 PM**

Font: (Default) Times New Roman
